# Supplementary material
Source: PubMed Central journal article supplement (PMC3497697)
Supplement: JVI.01783-12_zjv999096839so1.pdf [file JVI.01783-12_zjv999096839so1.pdf]

**Table S1.** Coverage of the bacteriophage  $\phi$ R1-37 particle proteins by tryptic peptides identified by mass spectrometry.

| Gene | Genome location      | MW (Da) | Mascot score | The peptides in the predicted gene products identified by Mascot analysis are highlighted (different colors are used to differentiate between neighboring peptides) .                                                                                                                                                                                                                                                                                                                                                                                                                                                                                                                                                                                                                                                                                                                                                                                                                                                                                                                                                                                                                                                                                                                                                                                                                                                                                                                                                                                                                                                                                                                                                                                                                                                                                                                                                                                                                                                                                                                                                                                                                                                                                                                                                                                                                                                                                                                                                                                                                                                                                 |
|------|----------------------|---------|--------------|-------------------------------------------------------------------------------------------------------------------------------------------------------------------------------------------------------------------------------------------------------------------------------------------------------------------------------------------------------------------------------------------------------------------------------------------------------------------------------------------------------------------------------------------------------------------------------------------------------------------------------------------------------------------------------------------------------------------------------------------------------------------------------------------------------------------------------------------------------------------------------------------------------------------------------------------------------------------------------------------------------------------------------------------------------------------------------------------------------------------------------------------------------------------------------------------------------------------------------------------------------------------------------------------------------------------------------------------------------------------------------------------------------------------------------------------------------------------------------------------------------------------------------------------------------------------------------------------------------------------------------------------------------------------------------------------------------------------------------------------------------------------------------------------------------------------------------------------------------------------------------------------------------------------------------------------------------------------------------------------------------------------------------------------------------------------------------------------------------------------------------------------------------------------------------------------------------------------------------------------------------------------------------------------------------------------------------------------------------------------------------------------------------------------------------------------------------------------------------------------------------------------------------------------------------------------------------------------------------------------------------------------------------|
| g045 | 11548:12651          | 42,530  | 388          | MMSLTSLLEDDNDVLYKNPLMKVKKPKYFYGVSNYKAIQEILSSGVIDASQYRLRDTKAYRANDAVYFTDDLGRAFNWAYTKRSDAFNDLSGKDAFVFPVNPDIWSEVYFDEADFYIAVLGVLVYKMNQGEKLEKKAIEETKISVDENNNLNIRTKVDIHANPLANKVWELAFNTAGKIIISGKVSTIATPLFDILRNADIDLNDLVKISYGVKANTYKNI PMRYNKPESFNKALNMFDKLYSKDKDEFVKWVEEMKLDILAEMPPYQLKAKNIIAKKISHQYQKMLLKFIEFCSSFAYGKLNVMGYFSGDR EALSLEVQOKKIEHISDRYLKTTEQDHAINDYMRQFNKNSLGIKFTLLQNKGV                                                                                                                                                                                                                                                                                                                                                                                                                                                                                                                                                                                                                                                                                                                                                                                                                                                                                                                                                                                                                                                                                                                                                                                                                                                                                                                                                                                                                                                                                                                                                                                                                                                                                                                                                                                                                                                                                                                                                                                                                                                                                                                                                                                                                                                                       |
| g046 | 12654:13259          | 24,028  | 50           | MVTQSKLFPKPTDKMRRIPYIFISHMANFSLKFNPIAPYKLVYVAGYNLDKVESYFLENLEKKQLPYHFYVCFIKGDWKVFTGAPINFRSPLLTELSSAGYIQTAYTESIVVAVQDNFSLRVPDQLHDI IASKIIVIPYKQLLRNKDYLDVSVWFDEAFNKKQYSDMERYTYLRNKYPFQVTEMKFFDRVMFNIACRTYS                                                                                                                                                                                                                                                                                                                                                                                                                                                                                                                                                                                                                                                                                                                                                                                                                                                                                                                                                                                                                                                                                                                                                                                                                                                                                                                                                                                                                                                                                                                                                                                                                                                                                                                                                                                                                                                                                                                                                                                                                                                                                                                                                                                                                                                                                                                                                                                                                                             |
| g047 | 13259:13720          | 17,751  | 322          | MTVGVDSISYEGFDSSKYATFPESIADSKINPLLLLNVLSDKLVTNLDSBEIILQDPTCTFKDMLHFFKPYTYPVFPVPEKRYPEMTAKRLYGSADFWEILLLVNMMSTVMEYDKETINYIPNDKLTKITKQVQLHKGIRTVQEDDLASKDLL                                                                                                                                                                                                                                                                                                                                                                                                                                                                                                                                                                                                                                                                                                                                                                                                                                                                                                                                                                                                                                                                                                                                                                                                                                                                                                                                                                                                                                                                                                                                                                                                                                                                                                                                                                                                                                                                                                                                                                                                                                                                                                                                                                                                                                                                                                                                                                                                                                                                                             |
| g048 | 13800:14435          | 24,079  | 112          | MILT EEDVLNEIGFYSQDGRVTELEGISSFVSKVYRKLNSIHQLYELVRKIVKTALNRFKNSKLTYAFESTYQYLLGLSLKISLVLQKILDNKKDLDIGAEIFILEKAL LGIKIYNGGITIINKVDFRQVEVTSQGINNITDTRSSKALNRYQSOLISYANGSHRDKSDEDFKLLVKNTRMGNLVSNYARTANKVSIFILNSAEPV                                                                                                                                                                                                                                                                                                                                                                                                                                                                                                                                                                                                                                                                                                                                                                                                                                                                                                                                                                                                                                                                                                                                                                                                                                                                                                                                                                                                                                                                                                                                                                                                                                                                                                                                                                                                                                                                                                                                                                                                                                                                                                                                                                                                                                                                                                                                                                                                                                      |
| g074 | 31242:31733          | 18,425  | 51           | MSKSYEFLPRSFVTHENGNSIDLKAPEIIFNGNHKLSGDIMAQLHYHFKDKIPPDYFHVKS GHFGFESSFSANVVLIDTDKISRLEKVSILDGVDTGKFKVQTDGRTVSI LMGALLMNNLNTIIEEVDGDQDIPAKCGKRGKCEFSYHVELAKSNSETWDDID                                                                                                                                                                                                                                                                                                                                                                                                                                                                                                                                                                                                                                                                                                                                                                                                                                                                                                                                                                                                                                                                                                                                                                                                                                                                                                                                                                                                                                                                                                                                                                                                                                                                                                                                                                                                                                                                                                                                                                                                                                                                                                                                                                                                                                                                                                                                                                                                                                                                                 |
| g079 | 33842:34639 (compl.) | 29,550  | 720          | MSEQVVGRIFYESAPVEDAIRSFKVLVPLNGVVKMEAILQDADAENRNRVYYPKSVINNSLQHPFVQEKLATNSLFGEMNHPDAKGLERQLKIDMHNVCHLIK NPRWDDENPNLLIGDVETGNAVGKDLAGLIVCNMPLSPFSMRGAGDVVNRGLAYVKDPMRLITWDNVHYPSHKVAYARAMNEDVNEVPITAKMLAEYVASNSKNTQMMLLEDVMSLGGAM SFSVDKGVLTIEKKSGLAGFALVEANLQAEYQDAIILS IMR                                                                                                                                                                                                                                                                                                                                                                                                                                                                                                                                                                                                                                                                                                                                                                                                                                                                                                                                                                                                                                                                                                                                                                                                                                                                                                                                                                                                                                                                                                                                                                                                                                                                                                                                                                                                                                                                                                                                                                                                                                                                                                                                                                                                                                                                                                                                                                           |
| g081 | 35434:36822 (compl.) | 49,684  | 181          | MTAKAKVYDLNDKLI TELSTIDTSSKLLAGENNDLKAINIDIVKASLNYISAGSKADYNFAMEGILVLSNLYSDTFYSINQDMNDILNVLYSDRSLSAFVNSISSMSS ISSCCNKALGSCTSFANSINPANYSDISSYIKSIAQFLCPEASLLGDLGAAKSILNAVNTLRPAELLNAIKSDLASLMRDVSAASKYATSALGSLVNTIMS NLPPSANS LLGFIEKVQLYASAFIDLAQELWDAIESIMRMFGLTADDLFGIGILSDLGTSIKNAINNNSSNSNGIQIVPGIKVSPVDTIRCSQLAKIMQOQNSYRANNRYDYLNNS SIVSGITDSSIKLSFSNYSNYQTNASNANQSTKVYTSMGYLGK TALNSSMAAMVRNASSTRTINSLNGVNTDADYSAKSSIGNIANNLITVNVEMQKQTTMREGLKNIM TESNYNIPSTKFGV                                                                                                                                                                                                                                                                                                                                                                                                                                                                                                                                                                                                                                                                                                                                                                                                                                                                                                                                                                                                                                                                                                                                                                                                                                                                                                                                                                                                                                                                                                                                                                                                                                                                                                                                                                                                                                                                                                                                                                                                                                                                                                                                                                               |
| g082 | 36917:37492          | 22,878  | 197          | MGFNHSNDINVFNLEESSKRIPALYHISFKDNLEGEWKPRPPDGFQIKAKEKNKEKEVNITEPKTPRISCSTDLKKCFYAIYPNISFFFEKIKFPYMDFTVYSPRLNGEEK IWTPEYLTDDKLVHDAHVNEYCI LEKAFMQKVGHLRFVNPLKSNPPPEIYHYFPNNESEYERFLAYKVEIKVDSIK EK                                                                                                                                                                                                                                                                                                                                                                                                                                                                                                                                                                                                                                                                                                                                                                                                                                                                                                                                                                                                                                                                                                                                                                                                                                                                                                                                                                                                                                                                                                                                                                                                                                                                                                                                                                                                                                                                                                                                                                                                                                                                                                                                                                                                                                                                                                                                                                                                                                                      |
| g083 | 37498:45156          | 271,439 | 555          | MAYLKGLATSLAKRVIDPVGNIKFGDELNTYKEIKDKVFTSREILRETQSNIKTTIQSFEFGFSKVGRLNLRQVRSRGKFGLTQDERDDIDMKAMGFDFDMSLGDSDLNALEQ DGENENSSGSSKASKNIIIPMMGKSSRGRNGLDAGSALISERLAYITGIQAQIGQTQITLLQGLGSLAGIGNFLSEQTVSHYQGTLEYQKLMSDNLSLSREVNLDLMKEKLM AEKKAEEKMATGSSGIGWEGFDPTRIAKDINEGPLGMLFGEMSPLRGFFQQVSVDPDPLGTIMALGLAHGAGSLFGGAIKAKGAFKTAGVRLQSTLEKWSATYDSDSFTGMFKS WIGDTRLAKRESATVAKLGAYDKGAAQFDGTRKAIVDVIMPYLAKILKAISGNSTHEVYDYNKGAFITSKAGAAEHVKNVKELRGEFLGGISNELTGLRGDPSVSKSDFG KIRASMIRASASSLSHEIKLDQVKMRDARLQETDYKYIKSLDEKSKASLYHSFQSHKYDVAALKDYQNSMYDENKGVETSAILEGVNPRILGYDAVEKANRKL DENERK KLKDRIKDSVKKLNGIKDRRRGGGNPPSGGAGDSGNSGGSDGDDAAGDSWFKRWLKGKFSGGKFSLTSTFTBGLVGTLTIGMKNLSRGFNRHILFPMKALLGKDADTRT IARTPPIAAVGTKFDKTVLFPPLKVVLLGGNEKQAESMIFGAIQKSFDRNIVFPFKRLLGKTDVVRTILKTSFIKSLGIRIDKSVLTPFKTMLLGGNKVKAEKVTFVTALK DTFKKNVLPMLKALLGKDTDLKTLTKTPFTKAIQGRFEQSILNPLKGLLLGKHSTTNGGSDVPTKTGFFKALGLSFDNRNIGRPIKTMFLFGQGNRNSFFKNIGETLSPFFN KLLFGSEKAEKAGFMANLKD FGSNVFKGFSDFKIKPIKDAFSDFFGKTMQDFIGTLRDSAKDFLGLSLNINIGKGFKEGAKGFFKTVFGDETVKILRDNIVTPLNDVTKKLS SIGMIAKLLLRVPANFIKGITNTLKLNRVKS GKNYSDEEKARLLDMEKKGSLFNFLDVGNESNKKISSLKNKVTGFLNRGKATDGSANANVETLDTNSANAKGTES ISDRARNLFRNKGKASSVDGSNNPNTDADGNIISASSTNGKKGTKTGFIDGLNRVSGKNSNSVDENGNPVEGGKSRFGI IERLPSRDKVGSVLFGRGKQNSEDSVQGSTKT KAGTLTGIPVGSAGLGGIVGHLNAPKLASRVDTISKMSELTSSASSAATAKSNMDILNPLKHHLSNNTQKLTKIVNAVAKGKTVSKISGEDKESVSFFRNPLKWAMRTSMKV LGFPLSMMKGMF SVGSKMVKGLMEVPKKIIGITVDLGTKLASMTLNVAASLTKGIFKAVDFVAQIGKTIETIGKAVNSIVRSITSLIATSIDI AAKAASLARGVNLATKA IGRGLLPAFEGLTAMVGRLGKGLFELGTLVIDGFVKS IGMTKLAGRMASGLMGKVFGRDRKLSASFSSITNFKDLILATKKRPMHVYIEDGKVATYEQKPPSTFFKDKVE DRSLNLSKRDKAKEKDNITSIFGKIANALGSLFSGLLAKGLGALTGILKGGGIFGKILLAITVMSKGLMSLIGTIKINVATLVFGRKAGDLIDNLPGRRRGRGLRAGKAGN IADRYYTAAKAEKQAIKDRASKAADKLANARNAVAEKQASAKTSGNKIAEKLANARTVAEGGSLRSRSCAGAAEAGANAASKGGGMFSRRAINGADFFYKAGERLATGGGIGC AVKGFGRLLKGGWKGFGISAIGGLADTFFDKGTAGNDVMTGASYGAWGATIGSVIPGVAVGAIIGGLVAVKGAIPHLIETFKKPIIGMTFTFAEIPDRISQYAEQL PNKISGLVKGIPEMINGWFLGDAEETPKIDEKTQVVIQKPKGIMGSLFSSIGASVMSVAKALPRIAATLVEGLVKGIILTTVSLMGNVNSAMNFGVGLGVDIKMMAARAI V AIKNKTFLLSDEEAQYKELDKQAADKAAIVSSSNTMEFVNLTKSIAFSVADKIPTGIESSVMQEKLYEKSMKESNGDKAKAKDAFIKSYTSGGKSAKEGEDAWAY QER AQNIRNGTDDGVNTPPEYKGFQGSISEAITKAANEEGVPVGLMMAKIESNPNKAMSPNGTTFKGLYQMGPDAWKENSPNVNGDIFDPYLSVAAAARFIKKNINYMKS KGVPI DNTSVYLAHQQGGGIVKIYNAAKNGTPLDQTTIRNMTNRRPQDGNKSATS DPNFELRWAVAVKNKGGGSDGLTDSLPAFNANSGITQGTASAI SGINNATTTAT GSSGFDP SALLMGMSKGLNPNLVSTVEVETGNRPNVGSNPNRPTAQVAMKSSMNA MPTTGSNVTAGAATATASP SVTSQEVVKAQAVNNAIVTADTAKYSQIKDNINNA EANSVLAKLLEKTNEILTGIKSDTGVAENTKHDEVTESIRYNSQSSNK TASRSQDERVGSNRRFFENGLDLYPSEGAKRIAQGGAS |
| g085 | 45613:46983          | 50,534  | 114          | MEIINTAMNALNTATSFVSGVSNSTGKSFVAGDNPYSNLYNDSAGFIFGKPLAFNPKADPNQRVQRTLNRNDTIVNFVPGVPYTNQSMVDQANTILTAHREKLDIILLNSP VPDERAIANLCQDTQDALLSQQCDLRYYTFKQDVAGFLRALQIMVNRVGTSVFGWNQVSGFVSDLVASNVS EDDMLRGRFKVWVDKATSISESVDNSFTQSVLESTQKSISS                                                                                                                                                                                                                                                                                                                                                                                                                                                                                                                                                                                                                                                                                                                                                                                                                                                                                                                                                                                                                                                                                                                                                                                                                                                                                                                                                                                                                                                                                                                                                                                                                                                                                                                                                                                                                                                                                                                                                                                                                                                                                                                                                                                                                                                                                                                                                                                                                     |

|      |                         |         |      |                                                                                                                                                                                                                                                                                                                                                                                                                                                                                                                                                                                                                                                                                                                                                                                                                                                                                                                                                                                                                                                                                                                                                                                                                                                                                                                                                                                                                                                                                                                       |
|------|-------------------------|---------|------|-----------------------------------------------------------------------------------------------------------------------------------------------------------------------------------------------------------------------------------------------------------------------------------------------------------------------------------------------------------------------------------------------------------------------------------------------------------------------------------------------------------------------------------------------------------------------------------------------------------------------------------------------------------------------------------------------------------------------------------------------------------------------------------------------------------------------------------------------------------------------------------------------------------------------------------------------------------------------------------------------------------------------------------------------------------------------------------------------------------------------------------------------------------------------------------------------------------------------------------------------------------------------------------------------------------------------------------------------------------------------------------------------------------------------------------------------------------------------------------------------------------------------|
|      |                         |         |      | AVKQARFLGGAANIAGMNAESVVKSSDANLEAVGNMNELASRTLKAGSSFPQVQVFDSSKFSR SYELYFRFMSPYGDDR SVFYHVLFPFLAMLTAALPRQDNISGYTSPFIMQ<br>VDAPGYFSCPMGVVTALSF IKGDEKLFNRRGLPLIIEGTLISIQDLYSNLSLPLSFDQFATNLGTS AFLSNMGGMSLYSVMDV SARNYVQNWSKDTLTKFIQPYNWMNEESL<br>KVRRYFGLY                                                                                                                                                                                                                                                                                                                                                                                                                                                                                                                                                                                                                                                                                                                                                                                                                                                                                                                                                                                                                                                                                                                                                                                                                                                               |
| g088 | 48997:49254             | 9,958   | 72   | MESTERLSYLDNRQLNESVKRIVTTAVENYVKKVQQSNADSNVNTDRAIEALKNQLFLKFTGIDYELLFQSVYLDRKLNNGGFTTYE                                                                                                                                                                                                                                                                                                                                                                                                                                                                                                                                                                                                                                                                                                                                                                                                                                                                                                                                                                                                                                                                                                                                                                                                                                                                                                                                                                                                                               |
| g089 | 49250:50341             | 40,170  | 119  | MSKPCSLNLCYGNTEKEDVNSLKENLPMNLLNLLGLLNCANNNTLKNAPGNWGLNI FAMQKLVDDINDVNNGGGRYDISDYNNIPDNIYNNLINDYNDLLCRQGGGLIDI<br>DDKYNGNGDGSYVRPLFPDGLTDADKDLIIDHLNMMNNNGNDNINNGENNLVIVPPDYTDGSGTSGSSTNDDIFGESGNPIYNIIPNYEFNDGIDINKSVFKCFEPVFKLDNYI<br>YSNSEKLFITPTK VANIKRVHNEILLPLYNFYGNTTAPSCQIKVFFGIGSRSEINSVAAGSSFSRHSRGEAVDFTMVGIDYKFLSDLKSGSLNLFNGILIPSNGIHMTLP<br>YTYEGYTIQNTVINSKSKANSLSIEYL                                                                                                                                                                                                                                                                                                                                                                                                                                                                                                                                                                                                                                                                                                                                                                                                                                                                                                                                                                                                                                                                                                                               |
| g094 | 53058:53420<br>(compl.) | 12,141  | 400  | MALNPKLNDLKFPEGVSYNIVKLSALVANAADTQVTLITTRTPVLAKSSTASTQITIVYVDAGAVVQKTRAPNSEGKFTTDFAAAAGSGGGVTTEAMNAAIKAATDPLAAR<br>TAALEGAGG                                                                                                                                                                                                                                                                                                                                                                                                                                                                                                                                                                                                                                                                                                                                                                                                                                                                                                                                                                                                                                                                                                                                                                                                                                                                                                                                                                                          |
| g099 | 57455:61633<br>(compl.) | 157,842 | 976  | MAINIDRVRPNKIYKVEKLLVNI SKRKKPLCNILFNDNSVTSIERDFEMIRVIPNSTKKIFYPPIKINPNTMTTRKDSV GANDYYLELKNRILF SR LKTIDLIESPKFSN<br>KPVFADLSKYRESYNOYCANKKKTYVTGYMMFKNI IK SFISQLPKKVDYQFLDLDEE P DFFINTFLYGLKKEPKVINDLFKGIDL VFFHQIGNLVYRPGDLNDINKK TQIIN<br>LINKVIKLGKAI AQQEVNDPDLLEVVTXIDPKDQELYDQSLQAYQHDDEEDSESTDNPEPSKRFTATDDSTDESEEEKTNDNSTDNDSVEDDKYITGSSTDEAPDLEIVD<br>GALKDGDIDLDTVLNTSTV NAYTEK VRENEKFLN NN LK LQEAALKEFEELANKLAESNTLEDIRVNDSDIINPKVKSFR TSSITHSYKKGFKDIANI IKCLNNDPEHPV<br>VVTKLEVTNVS NPLTKANEYHI EYMDKTFKRHQFRVNVPI LSHDGFMLINGKNKFI AKQSIVLVPVKEANDRVOITTYKKTFLYRKGDKINGQIDRVIRILVKGK EIASITK<br>KHGNSYESNLEFNISIPYNYLSRKLFAISLEGYDIRLNQKEIRETLANKKITIDYDKYIPIGFKGKTVILEE IATRNI VGYETGK KYEALSDNLTKFLDILT GSKDPEIQD<br>ALKSTKPSLSL SYTNMKIVSTSV ALGVLVAAYRGLLPALDLYDIPYRIEKRVAKTDSEVLLTFSDFYVVIDTKFDPAKELFANGLLFLNANEYKLEEATRMSPIFLDYFET<br>HSGSRNTAKALVNFENSMIDPI TLEILKELKMPNFTTELLYGNLLGDYQRDRKNDMYHFRIRDSEVIAVAFYNSLVD AFN NYKRSTGSGVPTISVKRDDVIRRIQAMPN<br>VEEYSTLNPIQIEIAKSKVTFKGPSGLNSED SYIAENRAYSKTMLGLYGIFSPISAQIGVNRSMAFNPKIDTIRGYIREKDIKDFADNLFSAAELVNGFTPKHADAPRAIM<br>ATTQNKHIINTKVOHP TLVGTGVDKALAHIQEQFAWKAVKDGKITSIDEEKNLVFI EYIDGTTSAIDISMKAAKNSGGGFYIQNKLDLVNGIKVGSFKAGKV IAYDKNFF<br>KETLDG SICFAGGR LSKVAIMALPETFEDSAVVTDTLSKLSSEVINKR DVI LKANR I IKMAQVGEIEVNDALVIFEVGNDEALAALEKLDKQTQASISELARSSAK<br>AKYAGRIVDMKLYNTPIEKMHPTLRKVQSYIEKYDEKSSSLKNISPEFIQTPSTEMESNKLMGNEVQGVVIQYLIQHL DPLDVGDKITFTSLKTIVANTVDTEKAPY<br>SELHP EEEVSALLSPLSII SRMTMDFYLQCGANKVLI ELKRQVLDILEE |
| g101 | 63492:64532             | 38,694  | 128  | MAKKPGFLDKLKKGKTASKEEETLKGKAAVEDDEEEEEEEVAPPKSSKKPVLKGGKPKVVEEEDDEEEEDDAEEETEDDESEESDDEEEEEEEVAPKSSKSL<br>PVKKGKAPVVEDDEEEEDSEEEEDDEEEVAPKSSK K VAPKKAAPAKKA AKKSKASDDEEEDDEESNGGKPLFGGKAKKAATLRTPKEGATMPRENIISMIAEKLD<br>CTKAEAKTALVGIIEVLKEVGEQYSFRFMDSNFRRRVNVTRDYKAGGLTERVSSDVAAMTTRVESHVSLKGEVITYDRRTIRGVGEGDDFREGNMVGK FVAGTWDEEGNFT<br>PSEKVKKAKK                                                                                                                                                                                                                                                                                                                                                                                                                                                                                                                                                                                                                                                                                                                                                                                                                                                                                                                                                                                                                                                                                                                                                              |
| g128 | 79877:81196             | 51,650  | 249  | MAKVKRILTTEELVNRNLEQFTKSDSTETYPAFQESTPVFVTYYNK SAYASADIN FENFNQAVGVESPNLFY EIASLPLYEMTTADFSTEETDSGRKSNITGTCTIIPGTVT<br>PSVEDQFLFDYHSQKYL FVITSIEPDNFNKYYRVSQYLSPNLDEIKAQVYKEMVVDY NLIGRTDSALIERKYS DYLNII RAVFDEFRKSYRYSYENQSCFANKRTEV<br>IDQFINYFAANN DILPAFEDYRNTLTIHNKIIDDVSEQQYKLSPPFDLEKRRDPVSVS V FVEPVDRTPYKFAEFYKTKYNFTRYV KYTDEEVEIPSAEELAQMTEEEQLAV<br>MDSIVKGYNLPELLEPINSNDPYNLQFIKKYIATFSKLRKTDQYKSQLIECLDMVEDELEEYFC DALYIKGASDSDKKEYDFNYIIGMIVL FALKDLYS FITNS                                                                                                                                                                                                                                                                                                                                                                                                                                                                                                                                                                                                                                                                                                                                                                                                                                                                                                                                                                                                                                          |
| g129 | 81243:81872             | 22,677  | 158  | MKDLTNELLTGGNLLAESVDQVETNVAIQEELQMANPTALLAESMEDMLFSE DARIDGNNIEMPSDAGIDSLQFFNQDNVQSVADSTLTGLDPRQNDFGNAAFASNPK<br>GKDMVQLRSVGDNVALGESGIPSLFTEGGDEECDTETKDIANGVDDQTSIGDAGDSLES LKLFKEDDDNDSESDVEEDDEDEDDEYEDLGL                                                                                                                                                                                                                                                                                                                                                                                                                                                                                                                                                                                                                                                                                                                                                                                                                                                                                                                                                                                                                                                                                                                                                                                                                                                                                                         |
| g130 | 81947:82549             | 22,697  | 51   | MSNLDPVVYVTTI STARQIPFINRRGPITSKISMKSTIDTLKAMGFVKIIESEVNLKNGKQYADDASKFVPADNQSESNVDVNI VDAIKPNDEEIFSGSTEGLEAKKDDLS<br>HSQQEEETPESEEEVDDTQEKPAEESTEEEDDDFSLESYETYEKWNATKLYIISDTIIPRLEEEDVPDPIPTSKKDCLAFLKTLLE                                                                                                                                                                                                                                                                                                                                                                                                                                                                                                                                                                                                                                                                                                                                                                                                                                                                                                                                                                                                                                                                                                                                                                                                                                                                                                           |
| g131 | 82729:83088             | 12,634  | 128  | MATVNDLLAQVOTNLKAQGV DSTKKECGVALEAVLNAIQTV ALDQGSIRTAIGTFKRKECAARQAHPKIGDKVDVPAKITVSFKSYYNEVVGEEKKAAKKAAPAKAAAPAAK<br>KVVKKGLK                                                                                                                                                                                                                                                                                                                                                                                                                                                                                                                                                                                                                                                                                                                                                                                                                                                                                                                                                                                                                                                                                                                                                                                                                                                                                                                                                                                        |
| g133 | 83554:84015             | 17,241  | 92   | MTLIEQLNDKKEIISGFPGIGKSELFKIYGEARVSDSDSSKFPKDSFPANYVAHIKDLIVNSNKKYILVSSHKVV RDALVAEGIPFLVYPNENCKDEYINRYIKRGSPEAF<br>VSLLSNNFN NFVQECKTTNSPIATHIELSDGQYLSDVLTIG                                                                                                                                                                                                                                                                                                                                                                                                                                                                                                                                                                                                                                                                                                                                                                                                                                                                                                                                                                                                                                                                                                                                                                                                                                                                                                                                                        |
| g134 | 84113:84796             | 25,523  | 372  | MSALFLSTLLQEDSADGGAKSSADL DLTGDKGDLK DQKDVKS DSDSDDEDNTNDDNDVSDN SDDTETDSSSPNDSSDDTEATDDNDSEEDDEVLNQR ELEEQRKKL<br>NRYNQLKSLVVYTYRNL DGIYDKLLKLDLPGGLPNTIRMFKDKIAYNRESL DKL LLDVPIFNNTVSELTAIHNVM S DLR AVSTNLKVLVNSSVLNHTKDNRAILSII SRDA<br>ENRR                                                                                                                                                                                                                                                                                                                                                                                                                                                                                                                                                                                                                                                                                                                                                                                                                                                                                                                                                                                                                                                                                                                                                                                                                                                                     |
| g135 | 84901:86454             | 57,483  | 2760 | MSVDYGFANLRSKTKHNSKATAHLKTLVEDYKGEVDILSEG YVDVVRQVAFQEYERLSEGTSEETGEQLAILSENTRMVMLQESMIGGVNPIAALSPLMRI GYPKMAV<br>REGLPTEPVEQPKFKVTTKRPYVLDTATGEKHWLPGAFO TKKELFGLPR LQONDI TVPAGGLIDYDMLAPISK NALLGDEIDPRFTVVEVTD SADVAISVSFELDTNLNAIV<br>GSFV DSTNAAVQLGKVDRSKGLLTLVTPGNAIKVKVIQGYVSSEMNAATQVGFIDGVDITIGTQPIESPINIQQMTDVMAMYNVDSTLTHMETMSTALAQSTDLEGV<br>QFIYDCFRNTRKI QETFDAMPSPNFLAGPVEWRKNIHRNFRDLVMSQMTEFNIYTGHAVVFCPLDAQVAVDVRWMTYNTTEQPNDAVDFRVGTYSGTTTYVVLQSPNFV<br>QGHYEVYIPSEADFKSLVYYPYAFNVIRGAASPNTPLPAIQMIKRYR FQKFNMMVARLNI VNNNGVGEV                                                                                                                                                                                                                                                                                                                                                                                                                                                                                                                                                                                                                                                                                                                                                                                                                                                                                                                                                                  |
| g146 | 93545:94273             | 28,165  | 79   | MEILDFVRESYSTLDGALEDFLSSKADLFSSAPRND FLEGLMSRIDS AKLSEDLSDDDKDELQLESALYHKIISHFRKDYSINEE EIANIFENAQITRFYIQKIYDLFYTGK<br>REILINFLANFI FDNKGF AKQYKAQVSKKDY EYSLRKLDSL SKPEYCI I I KAVEIVNDILEDTESDFK E VLLGSDLEVEDVETVYSLFDSSDNFSR FIDTLIGSINQ<br>DRISLEVKDKLGNMLKNAK                                                                                                                                                                                                                                                                                                                                                                                                                                                                                                                                                                                                                                                                                                                                                                                                                                                                                                                                                                                                                                                                                                                                                                                                                                                   |
| g148 | 95191:95886             | 26,368  | 140  | MASKKVEKYIVKGTSLVCKQDVKI IIPKTFNFDNNLSEFKDSQIITQGLFKMSSPDGKQDFEVKLP LSVKLN FYDMTSDSNFYFPYKENDVIEDMVFI PNVKQASAFNLN                                                                                                                                                                                                                                                                                                                                                                                                                                                                                                                                                                                                                                                                                                                                                                                                                                                                                                                                                                                                                                                                                                                                                                                                                                                                                                                                                                                                    |

|      |                        |        |      |                                                                                                                                                                                                                                                                                                                                                                                                                                                                                                                                                                                                                                                                                                                                                                                                                                                                                                                                                                                                                                                                                                                                                                                                                                                                                                                                                                                                                                             |
|------|------------------------|--------|------|---------------------------------------------------------------------------------------------------------------------------------------------------------------------------------------------------------------------------------------------------------------------------------------------------------------------------------------------------------------------------------------------------------------------------------------------------------------------------------------------------------------------------------------------------------------------------------------------------------------------------------------------------------------------------------------------------------------------------------------------------------------------------------------------------------------------------------------------------------------------------------------------------------------------------------------------------------------------------------------------------------------------------------------------------------------------------------------------------------------------------------------------------------------------------------------------------------------------------------------------------------------------------------------------------------------------------------------------------------------------------------------------------------------------------------------------|
|      |                        |        |      | LTAGKINTNSFTDVTVDVFKKSMAYNKVINVPSELVECMIAEMARYKSDTTIPFR IAYGTIKGVSESDYTMFNKYKDIARMTSVFGAVSFEDIKKSMSQSAVFMTR TNQDQTIT PTESVLKY                                                                                                                                                                                                                                                                                                                                                                                                                                                                                                                                                                                                                                                                                                                                                                                                                                                                                                                                                                                                                                                                                                                                                                                                                                                                                                               |
| g149 | 96008:97777            | 65,490 | 831  | MADYLHPSVSSR IVDNSAVYATAAGNTVLYAAIHSAGRDNAVEFVTTTDEFLEPKFGNPNLSK YGQTSYNILNLWQSGGTAYVLR VMPDDAK FANSLISIKTTAAADPAKAT VLVTAQAQTNTASKNAMK TILSGGTAGETPLCFIVPKGRGENYNYGFRLLSLR SDYDNTYNFR TYNLSVTVK DSTGADVVEGPIVVSFDPEAKDKSR OSIYIANINKYS QYVEIVDNR SAFETISEFVVGDEADPQKVDIIFGQER AVTPAETIHANVVWK SSSVTDTPSYDATAANFNNIQYLTEGSEGTWGTGNEESALLVK GYSGVLAPEILDKQQ YEIDVLLDGNNEVAVKNAMSDLCSEQR GDCIAILDSCFQGDAAQTIDYR TGNISMSTYFTAIFGQHMNVYDEYNGETITVTSTYFLASMI PSNDDQNGIQWTFVGPGRGVIS GFTDINFYPNEPWK EKLILAQVNYIERDPKKISFATQLTSQTSR SALSYINNVR VLLRIRREVEKMMADYR QEFQDNTTYDSMSYSLNNYLQQWVANRACSSISGTVYASDY DKQOSIARVKVELVFTGVIERIAIDLNVNK                                                                                                                                                                                                                                                                                                                                                                                                                                                                                                                                                                                                                                                                                                                                                                                                          |
| g150 | 97791:98540            | 28,108 | 2625 | MANSDILTYDSGLTGHDTSATGDNFFTGAIN TGQISHDPYVTGF AFWVWVSVPTWLSNPEEFKALSQKNFLAFQGLSNLEMETEGVRGGFTANETHYAK OTGAKPTEFTLRY QIHSGSPLDR FYNEWYSGIRDPHTGIATYPKQFGLYHSSNHTGVGLVYVTRPDANNFPAKNI EFATLITHMQPKRINMEHFNFPEQGTNDFATGEMPFSGVMHFGQQVAQYA ESYISDK VYNFITENNFSNINTYGS                                                                                                                                                                                                                                                                                                                                                                                                                                                                                                                                                                                                                                                                                                                                                                                                                                                                                                                                                                                                                                                                                                                                                                           |
| g160 | 104515:107148 (compl.) | 98,235 | 363  | MAKQKEPDI LSGAVSKTAVNKISERFERSNNRIEK IQNNLDKEDLDLNAK INKLNADIDK LATNVARR LLASANNTE SAAPPVDSMFYLANPPK DKEERKKRKANGKKIK Q ELEEKKKEITTSQQSLIRNVVESNKSRFWEYLSTYNLIIIRIIPKMLLAK TVANTIISPDDFTK CALNIMIDSENVEEDHAQIKDR VESLITYYDINTKLQNDVIAYLR DG KLIYLVLSMNEEK QMLSESASELDKVDYSYK TLNLSEGLNSADKSQLLENASFSK QGSIFLEEFK DAFGIKKBATGVKVGAAALDKFSEALKDFTFIIGDSSHLSEYSDVL LSEDMNISGFFGSAVSPFNATGEGNTQPGSNRKLADPEKEK ILKTKLGGNEKAIKVRISPGNIVDLTFEDNILGYLYLDIVEVDPDGTMPSPDKVNGNEGYTFMPSQVSGN GNVLQNMVYSGKDIPI DNGGGHSSGAKNVENPNQGR LDVADDAR LQFLAAAFANR L SDESNIK LIKK SATIKQAIYNTLSIR KLTRKDKVRVIYLPKEEVVMINRGHSIFDN ILFFAKIYITTLTLLMQNVLRGAPKRAVYVEVGLDNNPNANATQQAIRDVKSKEISSITNMDMQSIIINYVGEFQDYIIPVVDGEKPIFETIDALDAKSLDDDFLNLWLSNNI FSGMGIPSAYLTEVENVDFAK T L S M Q N S R F I R D I I G D Q V L S K G Y T E L V R K I Y N L N F K S N E V D D K S D P A K D E I L T K N A K S Y T D T Q S L A K A A I K Y F D I N N I S V K F P S P A S L N M N N L S E Q I S N V N N F V T T L T E N L T F D D T I P Q D D Q E K L K K K L I M R F T K K N L P N V D W D E L D S I M D E I V R E Y T G E K V E K S I S T S E E N E E G S E D V G G G F                                                                                                                                                                                                                                                                                                             |
| g161 | 107154:108185 (compl.) | 38,885 | 72   | MIDIVNESDLR L F I S K Y L K E G T F G T F S K L F N L E D K D N Y K G I F S L L T R K E I S L S D V E N L P I V N D Q Y V G E F L A N Y E K N Y F L P S N G S T T D F V A A D W L I P S G S P V R D L L V D Y N E K E N S G L L D K V I Y K V P Y I S Y K A T V G G L Y S N L S D F K H S F D E K A L N D I L T G M S V T D I S T L Q F S P D S T N C T D Q M K E F V N G I S S Q M N S L N K L S N D K L F N Y I V A L P D S N S A F G V S T A I F N N V F N Y K T S S K V I S F L V T N E I F H I N S L G E A P D E T Y M E A K Y S D V S S I K N Y P V F D D M F A T M K F Y I Q E Y L L A A T S E N N S L I N K L N A D L T L I A E Y E K F F S D I R K V P D L T M S A T N K Y L L V N T D                                                                                                                                                                                                                                                                                                                                                                                                                                                                                                                                                                                                                                                                                                                                             |
| g162 | 108185:109204 (compl.) | 38,088 | 107  | MNEGTISNSDIQEWVNTLDGTDTRVQKVLGAIQLLDGNNLQQLVYFLINGVFDISDLYTMNINNTTIRNK LVIYDLNDNK TAITQYKTKIKSFASYTNLINEMNGKTADRFA T A S L S P F R I A V S K V I D P L G I T D G S V S S V T V L M S A Y T Q I I N D S S L V A L Q N S I I S Q A A A I Q T K Y G Y R R L N N L V T N F F K K I S D Y Y F I F T T D N T L S L K I N Y T D L E F Y I A K G G F K Q A K Y T S F I E N F M S A L N G M V L Y Y D A D E T K D G S Y A V N Q L K N N V S F S S S F T D T I L S S S L F E S O F N Y A T F V R I N L Y S T V Y G S A F F N D T A T V K E E F D S I I S L F D N M Y T Y C T A I R T A C Q G V G V                                                                                                                                                                                                                                                                                                                                                                                                                                                                                                                                                                                                                                                                                                                                                                                                                                                    |
| g163 | 109217:109738 (compl.) | 20,229 | 225  | MIHIKELQDK F S S L D V N S K N Y V L Y E R L L L L D I S D Y K P L M Q E I L D G R L D I E D T R Q L L N N V I P S S N K T S T N R N L S E N I V D T M K S N L I A R L T G E N T S D I I K E N Q L F F N N L D D Y R Y A I A K E Y E S D L L A E T L T D D E I N S I L V V V Q E T Y Y Q L N L E D I D G Q N K F T Q I F M S N K M S Y K P I S K L                                                                                                                                                                                                                                                                                                                                                                                                                                                                                                                                                                                                                                                                                                                                                                                                                                                                                                                                                                                                                                                                                          |
| g168 | 112269:112745          | 17,193 | 894  | MKNTIVDELQNTSVTTNDLKNNASGDGAEFADATNAALTDPDLDIHADGIPLEEQEASLAQLAEFYKSMEGEGVLTBAARNIVRLNRQTKLNLNTR SALVMAARKGDPL FAKYAKFNKMRK A I R A Q I V Q K Y G A K A T S Y A R K L M T Q S V D N T G G K A K                                                                                                                                                                                                                                                                                                                                                                                                                                                                                                                                                                                                                                                                                                                                                                                                                                                                                                                                                                                                                                                                                                                                                                                                                                             |
| g174 | 118419:119195          | 29,598 | 57   | MFNNPPIIKIVGNSETLQALREKLATFTPEQIEETFRGGYSNDFFNRIINEARNKDKKPSVFEDILTDLIIKATKK KAETPKPTEEVEEVR IDLLNMSSEDIQNLKSKED LENILKSLDAYHHR IQSSRDMVWNTIMLREQEAHNSLTEIKSNLKDFIQIVNSLATDVK IQLPEIDKAK SVVWTWISDR LLVIEQKTKQVLNGAKTVAKAIQNGMICDNPT FFSEQVKVLEDKMLRIDQAKQLGKQLNELLSAVGY                                                                                                                                                                                                                                                                                                                                                                                                                                                                                                                                                                                                                                                                                                                                                                                                                                                                                                                                                                                                                                                                                                                                                                    |
| g176 | 120095:120997          | 33,503 | 84   | MAQQQKGGGNNRRQNSTYSSANFSSYDEQVSSLSFSYANEGSFIEVAPIIPTMIGKTPKQGEK VYDYDNRVSTFISPQHAVLLRRALNNLLELIEADEEIPAK TEVVMPTG QGIR RITIIAPGRVSLKIKGKK T S F P D N F M L K L E T K K S D D E T M L A Y H I L Q N S T V S Y I S G E E T S E E V V E H D M I M L M E F C E M A I E L S L G K V R H T A S M T R N L V N A N Q S S S S N G S K K G S A F N S M D D D D G E D D E D Y D N E T E E E T S R K S K K S S S G K S A K Q S P A K K T R K S I S S E M E D D D G D E D T D Y D D D I P M                                                                                                                                                                                                                                                                                                                                                                                                                                                                                                                                                                                                                                                                                                                                                                                                                                                                                                                                                             |
| g178 | 122027:123442          | 53,465 | 240  | MKLDIYVDVK FIEVNGIK EVTSAYVFAADGAPDPDGI FSYDI FGRVGNDRKNFNGYIDLKRFHFPLIYNVLMQFR NLPLVLAGEK YCIVSPK TGGIK IVPPEEGAETG IDFFVDNWSK IKNVNDSTSREK BALFETIPEELIFVEKWPVLPAYYR DVNFHSHKESKGVDMDEFNTFYIKLINTVQSNLI FTGAYATQNAQTI IVDIHYI SKKISGK GGIIRKAIMGK TVDYAITNVISAPRFNAEFYK DQMI P Y N Y I G V P L Y N V C A L F F P L I V N Q L E N M F Y D I A Q S T E F F L T Y D E K T G E A K Y A E T G A M V T E K L N S E S L R K L V A T F I K D K T K S I R T A R F N L G E E H M V I S S L E R M L G R P A T V T D I L F N A A A D V F N K H V L S T R F P V T G S E S L I I N R I K I L T T E D T V D L S N I S D R L T G S L K E Y Y K A Y P L I P S A N D G T I R K D K V K W I D T V I P N N S F L K G M G G D F D G K F                                                                                                                                                                                                                                                                                                                                                                                                                                                                                                                                                                                                                                                                                                                        |
| g196 | 135742:138291          | 95,261 | 76   | MANNDLQEMLRFRYPLNSTSMQPIITGQEGAVSMCKANLVTLQELQREADSAYTKFDISVK EARSSVGNNTINPNIPASSVTAQYLMGR IDMGVSVAVR LONEINKVLNPNL PDYVKMAYTPSVVDFGGVQAFNITYTKLKDIEKRAAIKEDNKPEIKEATVSSANTEYSLENKTFLKSMYDISIQMILPDNTQNDITQYITDILYSFNADNMVMPYISVKM KMPATLYDSIRKYFEGIKWYITVKLYTKSDTSQDQFAIPLSIKDFEELVAIDPFTSPGNDDSNRPEGLPIYTMK M D F V S A K G N A L N S I V K A R V F S N C K L I D V I S A L C S Q V K Q E Y B S T G N V D S S K E I K Y T I S P P D N T Q T Y E Q I I I K P G S F T A L H A L Q R E Y G V Y K F G I O V L F D G N H N I K D T N G V K P I S Y L T I T D K G G T A P A T N N I T D A L F E V V D P K Y V K N M I H E T G Y L I N N D T S S V T V R T F E P Y H L V K T N S D R L S R G D S V R M S T S O N S A S T V C D N P N D F S T Y N Q R F Y Y S K F D N P Y A L T Q L Q D N I R E R N Q M L T I E A R D I D I F T F N A N L N Y Q V K F Y S R D D E T G S G A Y R L K K Y A A Y F G F T R S G V K S R V E T S A V F E F G N I P E L R E N G V T A P R K T Y A E K V G S T N K S A S N S T L K G A T S S G T G G G F T S N S S N T P S V P F K T N F R N K D Y L G N T I P E T I P A S Y K M S Q O T T F E D V Y V T Q T G T D L Y K G N G L A N N F A Y F I N A Q R F A S E I L D P L F N S E G K S K L V D F Y K Y E T D G S Y G A S A H L V A A D V S F N K S G D E L I K S F I K I S N M G L D F D Q L I L Q D G D S S W K Y I H I G K N M N E T N R K Q V I L S P T S V N N D Y K V I N K A L T E E D V P K L K I T E F R K Y F |
| g197 | 138340:139185          | 32,333 | 754  | MDFIYSDKLFSLMEEESSQFKKVILAEELFNSAIIKLEADENSPEGENSEAAESFKKIKIKFLKRIETVR KYLIKLRDFAKKIFAK ILGKFERKSKGDKVK LKGFANFEK                                                                                                                                                                                                                                                                                                                                                                                                                                                                                                                                                                                                                                                                                                                                                                                                                                                                                                                                                                                                                                                                                                                                                                                                                                                                                                                           |

|      |                           |        |      |                                                                                                                                                                                                                                                                                                                                                                                                                                                                                                                                                                                                                                                                                                                                                                                                                                                                                                                                       |
|------|---------------------------|--------|------|---------------------------------------------------------------------------------------------------------------------------------------------------------------------------------------------------------------------------------------------------------------------------------------------------------------------------------------------------------------------------------------------------------------------------------------------------------------------------------------------------------------------------------------------------------------------------------------------------------------------------------------------------------------------------------------------------------------------------------------------------------------------------------------------------------------------------------------------------------------------------------------------------------------------------------------|
|      | (compl.)                  |        |      | FVEESDKFANGVTNIIISFVAQETSPEAAKASLSYNGNADGMKDI PAQDKQLVTEIFGNLSRFTDLTENEYTAQEVEAFKQKLMQIMGQFNSTNEQLLK TISHLEELKAKIE<br>QLFKLYKMNGKQISLDMLTRRTRKALFNNSVFLGEIAKFMNNWLKIHSDYSSKLVSGKE                                                                                                                                                                                                                                                                                                                                                                                                                                                                                                                                                                                                                                                                                                                                                     |
| g198 | 139190:139978<br>(compl.) | 29,967 | 460  | MNLDYTFNEIDNLEHHECSIPLKVAILTETTYLQDMQALTNSVDPKLIARLEGFLNDNSINKIFFSHNELVNRYSQSHEYDLASTLKS LNGR IECLSMGER VLHSLFDV<br>NISDFDNFSFTILSVNNHISKLCDQLDNANMYLNGNATDSNNTIFLEQIRTNLQALRQCSWIIDKFFPMLIKELKEIQHQFVDNNIQSPNIRLLDQMERLVSVVIALVNVK<br>AIRSPFFR VIGGSANSKSMVRMSDKGLGNSKMYSDQGF                                                                                                                                                                                                                                                                                                                                                                                                                                                                                                                                                                                                                                                        |
| g199 | 140087:140863<br>(compl.) | 27,259 | 7977 | MAMFLESANTQKVEAPSLFEALAEITDVISDSAILNESIMVADYKLEKQLSALTEEGGDAAKEDKAGFLGNVKEKVKAMAQRAYEAIMKVYNAVSAFISKQVVRKAAALG<br>AKTLELPESFKNAPKLVSAIEKAAANALGKDEFDAAYQEGLAAYRAAAEKGEVVKFLATDVSKVETMAKAANDRVKVAESLKAASAGGGDAAVV'TLNKAQRQASKLASL<br>SSKFVHALFKATHGARGVAADKAAEAKEADKK                                                                                                                                                                                                                                                                                                                                                                                                                                                                                                                                                                                                                                                                  |
| g203 | 141850:142593<br>(compl.) | 27,984 | 158  | MITAKNRKKAekli IDTISAMDPGSMNSRYKELFKSMSDKDFVEYFKMKKSEDNQFVEMDLYGKNDITLDNIEKAAKHINVPLEEYVYIRHKTTDGKVIPTPYKVPVW<br>VHMKRMQQLLSKKVKSNDISSGNVRSRLTGS LNQDNKSGRFTDYDTQALLSVTLDDPSKEDANGYSPIIKEVLGARGDNIENKFLQDISLPGNASIEEVD TAKSGQAVQ<br>TLDVFLMAAGLKS DLVSHSLINK                                                                                                                                                                                                                                                                                                                                                                                                                                                                                                                                                                                                                                                                          |
| g204 | 142599:144113<br>(compl.) | 56,354 | 431  | MLTFAEQDELKESLEKFFLEEGICNFNTLEKNILGKTLLEDVYFAKPELLKMEKAITDDIRTKISKEKNVKKLHSETRELGNLIAKYFGFAGCNINLGVLD SGFIAILVYD<br>ALTKGKTKELPMALMAFMPNAFTFKSMSQVNR FIPFDNSVIENTGKQIKYKNPMVAGILDITITPLFADALTSGEILSVILHEIGHNFYRGSYSAKLVSACQSAFDFPVV<br>LLAKLLNLLRNNMPDEMEYKVFGGINKVMMAFINGIGNFRKTSVNTAKQFEAIMGISIPLSLINIAQQITSILGFVSLPSKIMSMIAMDGSAEEKFDDFAAMHGYPGEL<br>ASGIAKLGMYGVRDKRAFVDVQDKLNKNPLNSDDYLLIAAFTSNYILEGFVELINIADPHPSNKARPKHIIIEGLKR LKSKTKDPVI IAKIDRDIKEIANNKFSIFPQDKKD<br>IDSMVNDNIYSYLFK TANPGEIAKELITDIWTLPLNFKPGLKQLGSVTTDAMGTNTEK                                                                                                                                                                                                                                                                                                                                                                                             |
| g205 | 144126:145283<br>(compl.) | 44,455 | 186  | MSTFILKNFEK KINDAINDKVKFANLKHINIYMDKNHEVIFAQGPMTRLLFNTRDQDVILEFVGVTEAEVKA VIKQVPSIKASWQILNPNFYILSCYMRDLDKQKRQADL<br>ELILMYSMLK IYSGLEPKYFKHGVNQQIMAF TLNLDLSDKFYKAAKNNYGVIKDVVFNHSHQYIEKLLREGNDEMLNDYLTQIFSR LNK IIMNIAKEEYNNRAKKNYLNVTVK<br>YDESGNLLDYENSTGVIQNLAEQVTYFYMSSNVDLISVQVAAKNSIPSSVYQTLASIRKNESPTTVKEFMTHLVGVYDADPALIGR VCTTDFAITALKQLSVSNSSNQ<br>NLIALKDELDRLLSIYSSKYAMTQRLATKMSYRNALYSYFVFLILINHCK                                                                                                                                                                                                                                                                                                                                                                                                                                                                                                                      |
| g206 | 145361:146332<br>(compl.) | 36,761 | 427  | MLKHVKKSQRRSAFRTLAEQRAAKRESEKILKEEVTQRFSPFKSSRSKQSKIAEKRNKHIQALKEVADIVRNACPIDGIKETPIDRVQAINCVDNFRSVVVS NPF<br>ETLREQSSHRYRVEIGGANKSTPADLINKVAAMRVDDPHFNAGEGQEVKFKAINVVDVTARGGKADEKIYIMNEGIAASLVGK MSETIRDRVVKSYANEVQRIQNSVA<br>FNEEDVMEGLNPIAAKNIKERIRKENNAHNITREIFSTVKIMNEHNSGPEPDLNETVLNMTILETLMNFMGLVESNVEPALKMRNARKEYMERSSTELI                                                                                                                                                                                                                                                                                                                                                                                                                                                                                                                                                                                                    |
| g207 | 146390:148978<br>(compl.) | 98,038 | 180  | MATSTTTSSITESEYLFQEKSLR LAQKFYSINDISLLK TGMFGYTTALNAHAMRDSAFHRDVLNFNEFFLINANLNGTLYNWA TLNYDISLAVPSKMPIAIKLPVNEIEK IAT<br>DSSSGNATKFTTISKDIKFDVSGYSFLLPYDLVINFYRSTSSKLAVNAYYDFESYSYKPI SIQTPYLK SFVSTEGGVDYITISAEIYQLTKQDFIFTISSNDILDAGIEVN<br>YGSNIASFQASYNANNTTSSYSDLELIFNEIDQPTTSQCYTYFVGDDTLR IYFSSSAGFRPDYNSKVKISVYTTKAEEGNFSYSGSINIKDTRLNITVKVSATTGKST<br>GGEAIKSFQETK LALIQQLRTRDNYTTTYDLETYFDKFKRENLSNSSEYQIVKLRDDIFRRQFTLYVLGKNSDGVITPTNTVDLEFSLSELENMYSIKPGTLVIYDRVTSK<br>YRLLSDDEYDPVYLSNNDNFYIYAI PFLMNDIFKEFPKTNVYHTNYDK SITTEYSYNIRSPYQAIINTIDIARNPLTDINDFTVSCNVMTDSADPANLKVRLIYDGTILKG<br>YFDLTRREDKTTVFSAKVNTEDTFTSDGYI I KDFI INPDNFTTYEDFPIETTYTIRLAVLINDTIDAAKTIDVYER MADLNNAFICDVGIDKISFADDLSDIMYHETII<br>DTSSTKISISKVPVIGALFYMNQFQNNELMNDFVDNLTAIRSVTAQLENNSTIDTKFFNSYGVSRVFAASGTIDLR IKMSIALTTTATEAIDKEIKAEVVSFIEACNNQSDKR<br>FSISNMITHLETNFSTIRFIKFFSVNGANIQNI EKTA YTSAKTENLPDYDVPYELTVTKVLPVSINTTQDFDYGIDITYI |
| g208 | 148983:149990<br>(compl.) | 37,686 | 80   | MSYEEVK SIDVAVERTDREFGFFLDRPTYPDATNLNYVFFTSPLSLTSGNFGSGVAGINTEVLLKNNSNFLKLPYGD SIYSTNIVNMLAGRSGIFMPLLTNRATSFP<br>ASPVVLDSDQYAE TWNKYKILMGTTAKDSRIGGEFEMAFLEDQNTIVLKSMLKWESEYIEGAF LGDIMS AVAASNMGSSQTSYFDYMSSMYHFVTRPDGKTLIYWAKYGTIY<br>PGNIPYDVFQSQDQGSII SVQC SFKFSYKEEMNIALNDFNLLGSSDSK SQIMDFTGKYFYENSVNLAASDVNPSIQKEQVNENGMPIYSLRMGETKDPFYPNGVNNWS                                                                                                                                                                                                                                                                                                                                                                                                                                                                                                                                                                               |
| g209 | 150145:151266             | 41,209 | 855  | MFEDNQTSNLLNEESVVEAILGTISK VGNFAIDK FSSSKGFDDLKAKENSLTLYALVSSNPADYK LISGGLEAKIATLIEVIAKNEISKDVASAKEFIQKSLTNTTMD<br>SLINLGK TQANKALGLSEDEVKTPRRKVSADMNSP IVNRKIDVKTSELAGRDKPFI SPGR LFTFDIRATNARGDVVSLTYSIFVKVNLVIDSDMLLVAMSDAKESSTLYQYI<br>KHRASGGGFGSFFKDVILNLKTLDRKVARATSNSLEDR ILNDLIRNKGLVAPNTTMVSDYLP LELKFMVVIDKSDADR LGSEFNSTLTSGSNLKAFFGNMMLSLCVIDTAR<br>DKATMFSDSKPTEMMVSLRDVSQDKKIAEVFSKIYSR                                                                                                                                                                                                                                                                                                                                                                                                                                                                                                                                |
| g210 | 151284:152372             | 40,737 | 1132 | MSNVSNFINEKTKAFYQNDLLSEQAYNR LNTTDKNSAKLQAVL TEYVNMKEVFKDFFGGKVDSSSEKELKALSNAKAPLQOIKSAGDIRKQVQDAANVRELLRFAISTNNSY<br>TGSASKSDLYSFINVANNITDLFDKMAASANDFKKAMIR EASVASDKRFVNTNLYMSLAYLITVTGSVYSSSLEADFDYTSAPKIVKNLYFSYKSDAVPEQVRYIGFAADQF<br>RKGSKKILQGMLEEFFAEERIALNENIFDVI VGLVAKSDDLSDLFLMPVYLLRWVVSFKYLVGSIK SVSDNIAESIALQKQOLVTKDQFDDYKQRSNKLAFSMNQ TAM<br>KADSAVELEASKDKKTLNLR SQGLVL                                                                                                                                                                                                                                                                                                                                                                                                                                                                                                                                             |
| g229 | 159873:160268<br>(compl.) | 14,521 | 182  | MGNNELVQCQLLEGVWEAKGNFKTNSTFTFRKAMHSLGISNFPDSEK KELFKMHTDKLOGMLDAADKSSLEGLVSKLEKWKI AAGGLKRIANTSGDAADIKNYNQAIIT<br>ITTQLNNEFLGKAKAKLAKN                                                                                                                                                                                                                                                                                                                                                                                                                                                                                                                                                                                                                                                                                                                                                                                               |
| g231 | 161796:163067<br>(compl.) | 47,442 | 340  | MFDINDPEK TILGITEEDITKSFLLNVFAVDAATNKPVMDSRTRIKIEESLVPADSILRKFKNWKDIVGTETNAGRIVNFVIGSAGTINGIENSHLATILEYINKPTTAG<br>VIGGLNRVISDAYDKYILSDVVKDFIDRMQWLGYTSAIYSIPSLDIKTIHPSEKVKKRDQMLKDNREVIESNDVMAFGKLENNEMIDFAKDLLEIGATGKMIYDSGFNGS<br>WNNNFKVNISIFRGIAPKSDDPSTFSIVTSNLMDGVAKEDIAPHADLAVLGAAGRAVDTQGGYLLTKLFNAAFSGI IADKPDSDCGTTKFINVELTGDNKR EYRYIYDKNE<br>LVCLTPALLEK YVGKTVKMRTPLLCQNKHYCHHCLGDMFYRLGVKNIGLHVSRSARIMNLSMKSFHDLVSQGEFDFIDHIEDINSK                                                                                                                                                                                                                                                                                                                                                                                                                                                                                     |
| g233 | 163355:164038<br>(compl.) | 25,672 | 1147 | MFEIDSQRVMTHDEKLLIQDAVRANKARENFI VIRDVPTNNILQVKNLNVQVGR EFTLRKLFKLPYSSENETLLHNRVYVCLFGIGSGGAPVSDPFPNITPTSADTQLNTAV<br>PFR IANTANPMPSEDANFYDTDKVSGSDTQYMKKIFTKVELITDITVKDDYVVKATLTINEKDAR GSR ISELGLPSAVVPSDNTYNDIKIFSRITFETEPLSAETGKGLIVEY<br>YVYA                                                                                                                                                                                                                                                                                                                                                                                                                                                                                                                                                                                                                                                                                    |

|      |                           |         |      |                                                                                                                                                                                                                                                                                                                                                                                                                                                                                                                                                                                                                                                                                                                                                                                                                                                                                                                                                                                                                                                                                                                                                                                                                                                                                                                                                                                                                                                                                                                                                                                                                                                                                                                                                                                                                                                                                                                                                                                                                                                                                                                                                                                                                                                                                                                                                                                                                                                                                                                                                                                                                                                                                                                                                                                                                                                                                                                                                                                                                                                                                                                                                                                                                                                                                                                                                                                                                                                                                                                                                                                                                                                                                                                                                                                                                                                                                            |
|------|---------------------------|---------|------|--------------------------------------------------------------------------------------------------------------------------------------------------------------------------------------------------------------------------------------------------------------------------------------------------------------------------------------------------------------------------------------------------------------------------------------------------------------------------------------------------------------------------------------------------------------------------------------------------------------------------------------------------------------------------------------------------------------------------------------------------------------------------------------------------------------------------------------------------------------------------------------------------------------------------------------------------------------------------------------------------------------------------------------------------------------------------------------------------------------------------------------------------------------------------------------------------------------------------------------------------------------------------------------------------------------------------------------------------------------------------------------------------------------------------------------------------------------------------------------------------------------------------------------------------------------------------------------------------------------------------------------------------------------------------------------------------------------------------------------------------------------------------------------------------------------------------------------------------------------------------------------------------------------------------------------------------------------------------------------------------------------------------------------------------------------------------------------------------------------------------------------------------------------------------------------------------------------------------------------------------------------------------------------------------------------------------------------------------------------------------------------------------------------------------------------------------------------------------------------------------------------------------------------------------------------------------------------------------------------------------------------------------------------------------------------------------------------------------------------------------------------------------------------------------------------------------------------------------------------------------------------------------------------------------------------------------------------------------------------------------------------------------------------------------------------------------------------------------------------------------------------------------------------------------------------------------------------------------------------------------------------------------------------------------------------------------------------------------------------------------------------------------------------------------------------------------------------------------------------------------------------------------------------------------------------------------------------------------------------------------------------------------------------------------------------------------------------------------------------------------------------------------------------------------------------------------------------------------------------------------------------------|
| g234 | 164092:166683<br>(compl.) | 102,150 | 120  | MKINDNTLEYIENLVQYIIKMVFK <b>DELSADSQETENS</b> MKASSEYMAAYLKMDNHTEAER <b>QOIINDYVELNPPYK</b> NLFDTYQIPYYTS <b>RAKDLDI</b> IYTDSDMETTYPYLSQY<br><b>GPIYK</b> KCLTYFYATNYAK <b>SMETEENYR</b> NFLCLMSINIMALINYIDNWLKYPPYDIDMMNESMIDDFILSGFISYFKSVPLQYKQIAK <b>ININSLIR</b> KNKGTDKVIINILDIFNFDN<br>INIFKYLRVRETRKETDGTTNIINNPR <b>FISHNIR</b> IDSLSKA <b>IKAGDYNDNTIADVTLGD</b> DTWR <b>TNTEI</b> ARYNFVYQSKYFSIESGFELAK <b>EGLNTVY</b> LLNLLR <b>KIRESY</b><br>SSKEFMTFTASKISLDPITLEDTLVLLQILTLDYQGVDTIEYDENLIVSIYQFKDR <b>SGTITYPVDIVNTPVD</b> PNLYPVKDMTKETSFDEK <b>TELEVFDY</b> NIGIHS <b>NIKDAL</b><br><b>HTE</b> TDYKR <b>YKQLK</b> Q <b>IYYARFTQK</b> LNYSLFNKA <b>ETTYDYILSRN</b> IDIYFN <b>INAIR</b> NIEDEPERQIEIER <b>EITYYTDVVK</b> SYLNDMDLFFG <b>STSDV</b> LISYLRDVI <b>EVFK</b> <b>SFTV</b><br><b>TLR</b> ELSFVMVLKEELDGR <b>IFDGVES</b> MSDS <b>IIPIEDHVTGATWDRYVFLGNFHY</b> YDKVHLHDITSIFTYLGKQVTTDWIYFKDK <b>QVFNADPHYK</b> ELHLRDSFR <b>ISVLP</b> LRDY<br>IPK <b>GDYFYDFIYSNK</b> WFNL <b>FDRVNIHDDLVR</b> YGTFT <b>MKDSIK</b> FNMYDQ <b>IKVANSYFNQF</b> DTVFVRDYVPVINTTYHNND <b>STDTLE</b> IDDNFPV <b>PNSTYHI</b> YDKNAK <b>LRDFO</b> TYS<br><b>SFMDSVNK</b> INFNDVFKKK <b>LANYSI</b> KEYNVLKE <b>VIKSTK</b> GNFYIDAL <b>PDFGSEK</b> AVPITSLPVK <b>SKMLMQDNF</b> VITV <b>TGED</b>                                                                                                                                                                                                                                                                                                                                                                                                                                                                                                                                                                                                                                                                                                                                                                                                                                                                                                                                                                                                                                                                                                                                                                                                                                                                                                                                                                                                                                                                                                                                                                                                                                                                                                                                                                                                                                                                                                                                                                                                                                                                                                                                                                                                                                                                                                                                                                                                                                                                                                                                                                                           |
| g236 | 167036:167455<br>(compl.) | 15,304  | 50   | MDSILNNFVSSYKNIILAICIAIVVVVIGLFLNGIADNAKASTEWEKGKYTAQK <b>LVSDQLEAAL</b> KAEQDKNKKLEAANA <b>IQQTE</b> IANLK <b>AE</b> DNKLN <b>NDIKS</b> NV <b>EV</b> IIKEVPAD<br>KV <b>ISKES</b> S <b>KALV</b> KIAD <b>NFD</b> T <b>VD</b> NLE <b>DL</b>                                                                                                                                                                                                                                                                                                                                                                                                                                                                                                                                                                                                                                                                                                                                                                                                                                                                                                                                                                                                                                                                                                                                                                                                                                                                                                                                                                                                                                                                                                                                                                                                                                                                                                                                                                                                                                                                                                                                                                                                                                                                                                                                                                                                                                                                                                                                                                                                                                                                                                                                                                                                                                                                                                                                                                                                                                                                                                                                                                                                                                                                                                                                                                                                                                                                                                                                                                                                                                                                                                                                                                                                                                                  |
| g237 | 167557:168264             | 28,371  | 184  | <b>MSSKQFV</b> F <b>PLDK</b> KKFSS <b>KPL</b> MYAYIEENYS <b>NMLSE</b> EMSPARLY <b>FN</b> LK <b>YNK</b> THGK <b>S</b> VI <b>SGK</b> P <b>T</b> WNEV <b>TERYER</b> F <b>ANE</b> E <b>ER</b> K <b>EYR</b> <b>QMP</b> F <b>SR</b> M <b>IK</b> K <b>Y</b> G <b>K</b> <b>DHIL</b> DEPE <b>QOK</b> <b>VMLQ</b><br><b>NRSIS</b> KEY <b>K</b> WCDGSIS <b>V</b> VNSQ <b>Y</b> EYDFLNF <b>V</b> SVY <b>RFDK</b> N <b>CFTE</b> P <b>PTI</b> YY <b>K</b> DGSNMNFYLPDFY <b>I</b> PSL <b>N</b> LI <b>IEV</b> K <b>S</b> NGHYQ <b>NR</b> D <b>S</b> Y <b>KE</b> K <b>LK</b> A <b>EAT</b> IK <b>EGF</b> N <b>F</b> I <b>QL</b> N <b>DR</b> <b>NYTP</b><br><b>FNIF</b> FKQ <b>V</b> LD <b>N</b>                                                                                                                                                                                                                                                                                                                                                                                                                                                                                                                                                                                                                                                                                                                                                                                                                                                                                                                                                                                                                                                                                                                                                                                                                                                                                                                                                                                                                                                                                                                                                                                                                                                                                                                                                                                                                                                                                                                                                                                                                                                                                                                                                                                                                                                                                                                                                                                                                                                                                                                                                                                                                                                                                                                                                                                                                                                                                                                                                                                                                                                                                                                                                                                                              |
| g239 | 168981:169373             | 15,170  | 123  | MPFFLKENLEDEE <b>TEV</b> FT <b>EE</b> EVDTIFGNFI <b>AYA</b> ERK <b>KG</b> YST <b>KE</b> ID <b>ILAN</b> RA <b>KLNS</b> EE <b>VKR</b> DL <b>LSR</b> IDA <b>AKKA</b> ANEAL <b>QKA</b> ESGS <b>DKY</b> REL <b>RLQ</b> I <b>QV</b> L <b>GEL</b> NS <b>KVKS</b> F <b>KIT</b><br><b>KYDE</b> PE <b>K</b> <b>KDDR</b> D <b>VID</b> L <b>DHN</b>                                                                                                                                                                                                                                                                                                                                                                                                                                                                                                                                                                                                                                                                                                                                                                                                                                                                                                                                                                                                                                                                                                                                                                                                                                                                                                                                                                                                                                                                                                                                                                                                                                                                                                                                                                                                                                                                                                                                                                                                                                                                                                                                                                                                                                                                                                                                                                                                                                                                                                                                                                                                                                                                                                                                                                                                                                                                                                                                                                                                                                                                                                                                                                                                                                                                                                                                                                                                                                                                                                                                                    |
| g240 | 169388:169852             | 17,295  | 49   | MDNVEVEGLDFVSATAESTKIETTLTLNAFGTTQNYTELQALAKRIQSLILLEPGTNPAN <b>IE</b> MGV <b>GIR</b> NYVTEFMDDITLTRLSR <b>VTLDQV</b> NK <b>FI</b> PT <b>Q</b> LV <b>KD</b> IT <b>YGR</b> SG <b>GV</b><br>SS <b>FVFC</b> Y <b>VY</b> IN <b>MTS</b> Q <b>EF</b> Q <b>K</b> NI <b>LAI</b> S <b>FN</b> SS <b>SPAY</b> TT <b>TI</b> ESE <b>IFI</b>                                                                                                                                                                                                                                                                                                                                                                                                                                                                                                                                                                                                                                                                                                                                                                                                                                                                                                                                                                                                                                                                                                                                                                                                                                                                                                                                                                                                                                                                                                                                                                                                                                                                                                                                                                                                                                                                                                                                                                                                                                                                                                                                                                                                                                                                                                                                                                                                                                                                                                                                                                                                                                                                                                                                                                                                                                                                                                                                                                                                                                                                                                                                                                                                                                                                                                                                                                                                                                                                                                                                                             |
| g244 | 173415:174284             | 32,789  | 69   | MATLDAMEDSALEK <b>EFT</b> VS <b>FL</b> NN <b>PM</b> GDK <b>SSV</b> MG <b>AAM</b> LSK <b>LHK</b> DYQ <b>TLL</b> AMK <b>RFK</b> VG <b>YFN</b> IK <b>KDY</b> IKIK <b>VP</b> SE <b>SET</b> LYD <b>VV</b> IK <b>FG</b> KT <b>NG</b> HL <b>PS</b> LN <b>PK</b> IE <b>FF</b> S <b>NA</b><br>PS <b>FT</b> TY <b>AH</b> AFDAY <b>G</b> CL <b>I</b> PEL <b>KK</b> L <b>F</b> DK <b>VFQD</b> L <b>PIN</b> R <b>ND</b> LI <b>TF</b> Y <b>ETIT</b> F <b>AL</b> F <b>Y</b> IK <b>EK</b> G <b>YLN</b> T <b>NAI</b> AR <b>DS</b> AV <b>TT</b> TL <b>QKL</b> IA <b>IV</b> V <b>PTA</b> DE <b>KLA</b> EH <b>KK</b> AS <b>DA</b> AV <b>AT</b> R <b>KQ</b> ER <b>AK</b><br><b>KKA</b> E <b>K</b> ED <b>KK</b> S <b>ES</b> AD <b>FK</b> NYIN <b>R</b> VP <b>EAP</b> K <b>R</b> AG <b>R</b> K <b>PG</b> S <b>KN</b> V <b>NNT</b> V <b>MN</b> Q <b>VK</b> ST <b>VK</b> SK <b>VD</b> N <b>K</b> VS                                                                                                                                                                                                                                                                                                                                                                                                                                                                                                                                                                                                                                                                                                                                                                                                                                                                                                                                                                                                                                                                                                                                                                                                                                                                                                                                                                                                                                                                                                                                                                                                                                                                                                                                                                                                                                                                                                                                                                                                                                                                                                                                                                                                                                                                                                                                                                                                                                                                                                                                                                                                                                                                                                                                                                                                                                                                                                                                                                                                                 |
| g270 | 191070:192023<br>(compl.) | 35,757  | 1004 | <b>MSFKFR</b> SL <b>KD</b> TYI <b>GE</b> IV <b>ANR</b> M <b>L</b> T <b>Q</b> V <b>T</b> G <b>AM</b> T <b>K</b> AED <b>Y</b> RL <b>T</b> K <b>DQ</b> L <b>N</b> L <b>ISS</b> D <b>IK</b> S <b>KI</b> SV <b>SG</b> K <b>Q</b> V <b>IL</b> DD <b>LES</b> G <b>H</b> ID <b>CL</b> Y <b>VP</b> G <b>L</b> N <b>L</b> T <b>G</b> WA <b>IN</b> G <b>K</b> D <b>Y</b> T <b>G</b> I <b>AN</b> L <b>F</b> G <b>K</b> I <b>R</b> <b>DKY</b> S <b>FSS</b><br><b>YQPR</b> EV <b>FG</b> V <b>L</b> MY <b>AH</b> V <b>QR</b> K <b>YA</b> EN <b>Y</b> N <b>L</b> V <b>Y</b> ST <b>PL</b> L <b>TNA</b> I <b>VYTR</b> M <b>VM</b> R <b>VID</b> S <b>MY</b> AT <b>AS</b> IP <b>VQ</b> SA <b>IS</b> YS <b>IAK</b> F <b>FLS</b> Y <b>V</b> VER <b>DHP</b> L <b>N</b> K <b>ETR</b> N <b>A</b> I <b>AM</b> Q <b>VAK</b> <b>Q</b> SS <b>I</b> AD <b>S</b> AI <b>E</b> FG <b>T</b><br><b>RF</b> N <b>D</b> EN <b>L</b> V <b>S</b> L <b>P</b> R <b>LF</b> S <b>G</b> L <b>EA</b> Y <b>T</b> V <b>VK</b> DL <b>D</b> V <b>NT</b> F <b>IR</b> K <b>M</b> I <b>T</b> Y <b>CEK</b> SL <b>FM</b> IE <b>LL</b> S <b>GL</b> Y <b>GT</b> ICS <b>AY</b> SS <b>N</b> L <b>IK</b> DF <b>IF</b> ES <b>VS</b> G <b>KE</b> GL <b>IAN</b> L <b>F</b> DL <b>TR</b> <b>N</b>                                                                                                                                                                                                                                                                                                                                                                                                                                                                                                                                                                                                                                                                                                                                                                                                                                                                                                                                                                                                                                                                                                                                                                                                                                                                                                                                                                                                                                                                                                                                                                                                                                                                                                                                                                                                                                                                                                                                                                                                                                                                                                                                                                                                                                                                                                                                                                                                                                                                                                                                                                                                                                                          |
| g271 | 192029:193801<br>(compl.) | 67,577  | 590  | MAYS <b>N</b> L <b>ET</b> SL <b>GV</b> GN <b>FR</b> EL <b>S</b> GL <b>L</b> EP <b>LS</b> K <b>VQ</b> P <b>INS</b> V <b>T</b> ED <b>LS</b> D <b>V</b> IF <b>NR</b> FK <b>Q</b> L <b>GE</b> AL <b>RYCF</b> Y <b>AT</b> GD <b>IA</b> IR <b>DKR</b> Y <b>LET</b> FL <b>SH</b> FT <b>NP</b> V <b>DR</b> S <b>YQ</b> F <b>ANK</b> T <b>A</b> H <b>AN</b> AN <b>WD</b> ANG <b>V</b> P <b>IT</b><br><b>Y</b> PA <b>STR</b> VE <b>YN</b> V <b>D</b> CL <b>GL</b> N <b>F</b> AA <b>I</b> TH <b>FV</b> FD <b>GK</b> LL <b>PK</b> SE <b>YDL</b> V <b>NTAY</b> GV <b>K</b> CY <b>IK</b> A <b>TH</b> IND <b>S</b> V <b>V</b> G <b>IK</b> I <b>H</b> R <b>LY</b> NT <b>SK</b> DY <b>VT</b> K <b>IT</b> ST <b>DL</b> T <b>G</b> G <b>CT</b> LY <b>VP</b> AN <b>LGT</b> F <b>Y</b> HH <b>K</b> Y <b>IN</b> V <b>V</b><br><b>AK</b> R <b>T</b> ID <b>GL</b> T <b>AY</b> V <b>K</b> F <b>R</b> Y <b>G</b> ID <b>F</b> ITE <b>INT</b> T <b>G</b> D <b>TAR</b> I <b>IF</b> ST <b>L</b> PQ <b>VAD</b> Q <b>L</b> F <b>IM</b> NG <b>VY</b> W <b>Y</b> EA <b>ST</b> NG <b>D</b> T <b>S</b> NE <b>VE</b> IK <b>E</b> KL <b>ED</b> N <b>S</b> Y <b>R</b> P <b>V</b> IG <b>S</b> IE <b>D</b> F <b>VY</b> L <b>NG</b> Y <b>HL</b> T <b>AG</b> K <b>H</b> Y <b>TL</b> Y <b>G</b><br><b>G</b> NE <b>F</b> S <b>G</b> Y <b>IK</b> LL <b>LANK</b> ID <b>DA</b> A <b>EW</b> IR <b>I</b> V <b>K</b> NE <b>C</b> VM <b>DD</b> AD <b>CI</b> I <b>IR</b> Q <b>DT</b> M <b>Q</b> E <b>Q</b> GL <b>I</b> T <b>TNT</b> DI <b>A</b> I <b>PL</b> M <b>TR</b> L <b>GS</b> S <b>F</b> L <b>N</b> Q <b>K</b> Y <b>LS</b> N <b>D</b> W <b>F</b> K <b>PK</b> H <b>R</b> Q <b>VM</b> EL <b>D</b> V <b>S</b> K <b>VD</b> TL <b>KD</b> F <b>EY</b> RL <b>R</b> I <b>V</b> NT<br><b>I</b> D <b>IS</b> V <b>IK</b> F <b>V</b> VD <b>NY</b> SE <b>FD</b> IA <b>EV</b> GL <b>D</b> N <b>IM</b> NTI <b>Y</b> A <b>DE</b> P <b>N</b> V <b>T</b> PD <b>NQ</b> GV <b>EE</b> Y <b>ST</b> VF <b>EFF</b> SP <b>Y</b> TA <b>A</b> VE <b>QLR</b> V <b>IS</b> N <b>Y</b> Y <b>QR</b> I <b>NNR</b> S <b>DL</b> V <b>L</b> D <b>AN</b> D <b>S</b> PT <b>E</b> Y <b>P</b> ID <b>IT</b> EQ <b>ML</b> ED <b>N</b><br><b>V</b> LL <b>D</b> AN <b>MK</b> Q <b>S</b> I <b>F</b> V <b>L</b> D <b>AN</b> Q <b>Y</b> F <b>ING</b> F <b>P</b> T <b>S</b> Q <b>E</b>                                                                                                                                                                                                                                                                                                                                                                                                                                                                                                                                                                                                                                                                                                                                                                                                                                                                                                                                                                                                                                                                                                                                                                                                                                                                                                                                                                                                                                                                                                                                                                                                    |
| g272 | 193826:195130<br>(compl.) | 50,670  | 107  | MSDI <b>Q</b> F <b>T</b> DN <b>L</b> V <b>T</b> K <b>Y</b> EM <b>T</b> V <b>N</b> AL <b>Y</b> SS <b>L</b> I <b>GV</b> RE <b>Y</b> FI <b>S</b> LP <b>P</b> T <b>Y</b> L <b>K</b> Q <b>V</b> F <b>IG</b> NS <b>IA</b> AV <b>TE</b> Q <b>PL</b> DD <b>L</b> KN <b>MK</b> PL <b>PR</b> MS <b>IK</b> M <b>NY</b> EN <b>Q</b> T <b>G</b> D <b>S</b> FL <b>AD</b> P <b>FL</b> M <b>AN</b> Y <b>TR</b> FR <b>AN</b> RE <b>MY</b><br><b>T</b> KI <b>V</b> Y <b>D</b> E <b>E</b> T <b>K</b> Y <b>IS</b> A <b>ITS</b> RAR <b>H</b> N <b>F</b> D <b>II</b> S <b>SN</b> K <b>T</b> EM <b>S</b> IN <b>IK</b> G <b>Y</b> LS <b>N</b> K <b>L</b> G <b>T</b> NR <b>YR</b> Y <b>L</b> N <b>D</b> Y <b>S</b> L <b>EV</b> PL <b>PASS</b> I <b>G</b> Y <b>A</b> K <b>H</b> K <b>G</b> Y <b>N</b> L <b>K</b> D <b>K</b> D <b>S</b> L <b>N</b> L <b>FA</b> EW <b>I</b> H <b>K</b> I <b>S</b> D <b>G</b> K <b>V</b> T <b>Y</b> K <b>TH</b> S <b>T</b> G <b>K</b><br><b>Q</b> FF <b>YR</b> Y <b>G</b> T <b>N</b> L <b>IR</b> I <b>P</b> N <b>F</b> EV <b>PD</b> A <b>Q</b> K <b>DNK</b> AV <b>S</b> ES <b>MLR</b> FT <b>VE</b> VE <b>Y</b> NN <b>H</b> NY <b>F</b> IA <b>E</b> SY <b>N</b> LAN <b>E</b> P <b>ID</b> DE <b>FL</b> IT <b>E</b> GG <b>M</b> N <b>D</b> V <b>M</b> H <b>WT</b> L <b>N</b> W <b>GI</b> P <b>H</b> Q <b>IGN</b> K <b>S</b> I <b>L</b> G <b>L</b> EV <b>TE</b> AN <b>SP</b> IE <b>E</b> ID <b>F</b><br><b>GE</b> Q <b>L</b> AR <b>AP</b> NY <b>Y</b> I <b>D</b> Y <b>L</b> R <b>S</b> Q <b>D</b> N <b>F</b> DEL <b>K</b> AT <b>N</b> L <b>I</b> Y <b>K</b> L <b>R</b> DR <b>K</b> EL <b>VE</b> DE <b>D</b> Y <b>Q</b> IN <b>W</b> K <b>T</b> K <b>V</b> I <b>T</b> IL <b>SP</b> Y <b>AN</b> D <b>Y</b> KF <b>FM</b> Y <b>A</b> P <b>IS</b> EV <b>N</b> D <b>Y</b> DE <b>Y</b> L <b>Q</b> N <b>R</b> AD <b>V</b> NN <b>V</b> IVES                                                                                                                                                                                                                                                                                                                                                                                                                                                                                                                                                                                                                                                                                                                                                                                                                                                                                                                                                                                                                                                                                                                                                                                                                                                                                                                                                                                                                                                                                                                                                                                                                                                                                                                                                                                                                                                                                                                                                                                                                                                           |
| g275 | 197299:197973             | 25,470  | 539  | MAMF <b>L</b> EST <b>V</b> TE <b>QQ</b> PE <b>LT</b> Y <b>V</b> ST <b>LS</b> IME <b>EL</b> ND <b>IT</b> I <b>EL</b> SEN <b>F</b> ES <b>FF</b> Q <b>E</b> YS <b>ILK</b> EE <b>S</b> DEV <b>KAE</b> KK <b>ES</b> FK <b>D</b> K <b>VG</b> K <b>TI</b> T <b>N</b> IL <b>DR</b> IR <b>V</b> AV <b>V</b> K <b>V</b> Q <b>FL</b> LY <b>I</b> SK <b>A</b> IG <b>S</b> K <b>R</b> F <b>V</b> RA <b>P</b> Q <b>ELV</b><br><b>R</b> FM <b>A</b> SH <b>S</b> IS <b>Y</b> V <b>K</b> NF <b>AD</b> DS <b>K</b> L <b>D</b> E <b>IK</b> DL <b>EAD</b> KA <b>A</b> E <b>K</b> AK <b>AD</b> T <b>MT</b> MP <b>A</b> E <b>K</b> FK <b>G</b> FL <b>N</b> PA <b>K</b> KS <b>PE</b> E <b>IES</b> G <b>IK</b> S <b>N</b> T <b>OLS</b> PEG <b>AK</b> VL <b>Q</b> AC <b>V</b> TF <b>S</b> LA <b>V</b> V <b>HA</b> IT <b>AK</b> T <b>K</b> GL <b>D</b> KE <b>PS</b> D <b>K</b><br><b>E</b>                                                                                                                                                                                                                                                                                                                                                                                                                                                                                                                                                                                                                                                                                                                                                                                                                                                                                                                                                                                                                                                                                                                                                                                                                                                                                                                                                                                                                                                                                                                                                                                                                                                                                                                                                                                                                                                                                                                                                                                                                                                                                                                                                                                                                                                                                                                                                                                                                                                                                                                                                                                                                                                                                                                                                                                                                                                                                                                                                                                                                           |
| g280 | 200731:201084<br>(compl.) | 13,507  | 280  | MED <b>F</b> IK <b>SL</b> FM <b>VR</b> T <b>AV</b> H <b>ML</b> H <b>L</b> SS <b>Q</b> SY <b>SE</b> H <b>K</b> A <b>L</b> E <b>T</b> LY <b>N</b> EL <b>G</b> DD <b>IDI</b> I <b>E</b> CH <b>Q</b> G <b>D</b> I <b>G</b> Q <b>L</b> I <b>V</b> P <b>SS</b> IK <b>E</b> V <b>D</b> LAG <b>N</b> AL <b>TF</b> I <b>S</b> D <b>FL</b> S <b>Y</b> IK <b>K</b> ER <b>S</b> F <b>P</b> V <b>S</b> K <b>GV</b> N <b>S</b> L <b>ID</b> N <b>L</b> E <b>TR</b> L <b>Q</b> RA <b>V</b><br><b>R</b> L <b>K</b> FL <b>K</b>                                                                                                                                                                                                                                                                                                                                                                                                                                                                                                                                                                                                                                                                                                                                                                                                                                                                                                                                                                                                                                                                                                                                                                                                                                                                                                                                                                                                                                                                                                                                                                                                                                                                                                                                                                                                                                                                                                                                                                                                                                                                                                                                                                                                                                                                                                                                                                                                                                                                                                                                                                                                                                                                                                                                                                                                                                                                                                                                                                                                                                                                                                                                                                                                                                                                                                                                                                              |
| g281 | 201097:201483<br>(compl.) | 14,163  | 448  | MLG <b>D</b> N <b>V</b> L <b>VE</b> ELL <b>Q</b> E <b>D</b> FR <b>PL</b> EAL <b>K</b> L <b>V</b> FT <b>GK</b> S <b>D</b> T <b>V</b> I <b>ST</b> L <b>K</b> K <b>D</b> IAN <b>AD</b> SK <b>SR</b> I <b>TE</b> I <b>I</b> S <b>D</b> I <b>D</b> Y <b>L</b> N <b>ATE</b> S <b>R</b> IK <b>G</b> D <b>I</b> GR <b>K</b> F <b>V</b> DL <b>F</b> IS <b>N</b> FM <b>G</b> GL <b>V</b> MG <b>ASH</b> FI <b>Q</b> EN <b>K</b> AK <b>GL</b> L <b>TF</b> K <b>S</b><br><b>Q</b> L <b>E</b> AV <b>K</b> S <b>IA</b> V <b>K</b> K <b>K</b> AS <b>L</b> K                                                                                                                                                                                                                                                                                                                                                                                                                                                                                                                                                                                                                                                                                                                                                                                                                                                                                                                                                                                                                                                                                                                                                                                                                                                                                                                                                                                                                                                                                                                                                                                                                                                                                                                                                                                                                                                                                                                                                                                                                                                                                                                                                                                                                                                                                                                                                                                                                                                                                                                                                                                                                                                                                                                                                                                                                                                                                                                                                                                                                                                                                                                                                                                                                                                                                                                                                |
| g285 | 203743:204606<br>(compl.) | 31,614  | 58   | M <b>N</b> L <b>S</b> K <b>QYQ</b> E <b>IS</b> Y <b>E</b> GR <b>K</b> R <b>G</b> V <b>V</b> V <b>R</b> ED <b>PK</b> GES <b>R</b> IG <b>V</b> V <b>I</b> PS <b>L</b> MP <b>F</b> ED <b>PN</b> K <b>PA</b> KK <b>DR</b> VE <b>T</b> T <b>GT</b> SG <b>R</b> AN <b>PE</b> IT <b>S</b> M <b>INT</b> SL <b>QR</b> S <b>N</b> Y <b>I</b> W <b>R</b> P <b>T</b> V <b>SS</b> GS <b>NR</b> VP <b>Y</b> L <b>GAN</b> V <b>V</b> FE <b>D</b> GP <b>K</b><br><b>K</b> GY <b>L</b> P <b>Y</b> R <b>P</b> TL <b>NG</b> ET <b>VS</b> Q <b>D</b> T <b>IN</b> M <b>AS</b> D <b>S</b> F <b>N</b> PS <b>N</b> K <b>P</b> N <b>V</b> H <b>IE</b> S <b>F</b> AD <b>GT</b> TI <b>Y</b> Y <b>EN</b> GG <b>T</b> RE <b>Y</b> G <b>IK</b> T <b>S</b> D <b>G</b> F <b>E</b> FT <b>I</b> AG <b>N</b> AG <b>K</b> <b>S</b> I <b>A</b> TP <b>PK</b> G <b>FL</b> L <b>N</b> IDE <b>L</b> N <b>Q</b> Y <b>V</b> Q <b>M</b> KE <b>D</b> N <b>H</b> V <b>LS</b><br><b>D</b> KE <b>Q</b> F <b>I</b> EV <b>K</b> T <b>T</b> GG <b>H</b> VS <b>R</b> L <b>D</b> D <b>KE</b> K <b>I</b> T <b>I</b> Q <b>T</b> SG <b>G</b> N <b>ST</b> V <b>MD</b> D <b>G</b> AG <b>T</b> V <b>TT</b> Q <b>NS</b> SG <b>AK</b> I <b>V</b> H <b>Q</b> GS <b>N</b> VM <b>IN</b>                                                                                                                                                                                                                                                                                                                                                                                                                                                                                                                                                                                                                                                                                                                                                                                                                                                                                                                                                                                                                                                                                                                                                                                                                                                                                                                                                                                                                                                                                                                                                                                                                                                                                                                                                                                                                                                                                                                                                                                                                                                                                                                                                                                                                                                                                                                                                                                                                                                                                                                                                                                                                                                                    |
| g294 | 209703:213608<br>(compl.) | 144,703 | 233  | MS <b>Q</b> T <b>R</b> ES <b>AR</b> S <b>R</b> N <b>R</b> AL <b>ID</b> G <b>L</b> NY <b>Q</b> D <b>G</b> T <b>LS</b> SG <b>K</b> P <b>T</b> SS <b>SLK</b> T <b>QS</b> FF <b>Q</b> I <b>FK</b> G <b>K</b> AV <b>K</b> FG <b>G</b> NY <b>K</b> L <b>TFL</b> G <b>NS</b> IK <b>N</b> SS <b>S</b> Y <b>I</b> IL <b>G</b> N <b>L</b> Y <b>K</b> D <b>I</b> Y <b>ID</b> G <b>L</b> G <b>I</b> AG <b>S</b> N <b>K</b> V <b>K</b> I <b>SL</b> K <b>V</b> V <b>NG</b> Y <b>V</b> K <b>Y</b><br><b>T</b> M <b>EN</b> N <b>E</b> NY <b>Q</b> N <b>SL</b> V <b>V</b> Y <b>NG</b> IE <b>Y</b> L <b>AL</b> AL <b>SN</b> V <b>IA</b> AP <b>VI</b> D <b>AV</b> MS <b>ED</b> T <b>LE</b> T <b>S</b> Y <b>ID</b> PT <b>Q</b> FT <b>TI</b> K <b>P</b> W <b>AV</b> Y <b>T</b> D <b>G</b> S <b>K</b> I <b>Y</b> ES <b>FN</b> L <b>PL</b> NG <b>W</b> IDA <b>E</b> AV <b>LT</b> D <b>G</b> T <b>V</b> LL <b>T</b> G <b>GF</b> Y <b>N</b> P <b>V</b> L <b>V</b><br><b>D</b> E <b>Y</b> S <b>T</b> S <b>Q</b> T <b>K</b> V <b>V</b> T <b>K</b> SY <b>IF</b> N <b>P</b> ADR <b>IFR</b> ET <b>S</b> N <b>L</b> P <b>Y</b> P <b>V</b> N <b>H</b> R <b>L</b> CA <b>IK</b> NN <b>CA</b> L <b>Q</b> L <b>G</b> G <b>A</b> Y <b>S</b> D <b>Q</b> ANT <b>N</b> Q <b>W</b> K <b>TV</b> G <b>D</b> IL <b>LY</b> T <b>S</b> D <b>N</b> V <b>SG</b> G <b>Q</b> W <b>V</b> L <b>G</b> Q <b>WS</b> NY <b>L</b> FR <b>SH</b> V <b>T</b> Y <b>D</b> D <b>V</b> ND <b>Y</b><br><b>L</b> Y <b>V</b> Y <b>IP</b> FG <b>T</b> SP <b>D</b> G <b>AD</b> V <b>A</b> IN <b>H</b> F <b>G</b> R <b>K</b> I <b>Y</b> GS <b>D</b> T <b>NN</b> V <b>L</b> G <b>A</b> VE <b>V</b> LA <b>S</b> I <b>P</b> TL <b>S</b> MP <b>S</b> SS <b>G</b> SS <b>G</b> NY <b>PN</b> WR <b>N</b> T <b>L</b> HY <b>Y</b> NG <b>K</b> I <b>Y</b> L <b>P</b> L <b>Q</b> D <b>N</b> AS <b>N</b> S <b>F</b> S <b>A</b> Y <b>G</b> K <b>W</b> N <b>Y</b> GL <b>V</b> D <b>V</b> A <b>T</b> N <b>T</b> W <b>K</b> <b>W</b> INT<br><b>I</b> AA <b>G</b> D <b>GS</b> Q <b>V</b> VR <b>IK</b> DK <b>LY</b> TT <b>G</b> W <b>V</b> S <b>QL</b> KE <b>GT</b> T <b>AT</b> V <b>P</b> L <b>Q</b> F <b>E</b> S <b>D</b> V <b>N</b> AD <b>ML</b> CF <b>DL</b> L <b>FG</b> ST <b>MY</b> K <b>S</b> PL <b>N</b> L <b>T</b> N <b>AS</b> Y <b>DI</b> KN <b>IL</b> S <b>A</b> G <b>SS</b> C <b>MA</b> AL <b>D</b> GR <b>IA</b> I <b>F</b> G <b>D</b> R <b>G</b> NS <b>F</b> SG <b>V</b> PE <b>Y</b> LN<br><b>T</b> K <b>L</b> V <b>N</b> L <b>NR</b> PS <b>V</b> GF <b>I</b> Y <b>P</b> D <b>N</b> D <b>T</b> S <b>D</b> T <b>F</b> SG <b>I</b> V <b>VER</b> E <b>IS</b> D <b>N</b> Y <b>SS</b> F <b>N</b> Q <b>P</b> FK <b>Y</b> KG <b>D</b> F <b>Y</b> L <b>ST</b> G <b>K</b> S <b>N</b> D <b>FG</b> T <b>P</b> D <b>G</b> SK <b>L</b> IK <b>Y</b> SV <b>Y</b> GT <b>ET</b> IL <b>N</b> VD <b>K</b> LT <b>K</b> GL <b>K</b> GA <b>AT</b> AV <b>S</b> KS <b>GR</b> V <b>F</b> IL <b>G</b><br><b>G</b> D <b>K</b> E <b>G</b> V <b>L</b> SN <b>S</b> FF <b>T</b> N <b>L</b> I <b>T</b> Y <b>S</b> D <b>T</b> W <b>AA</b> IT <b>SLP</b> IS <b>V</b> A <b>Y</b> GRA <b>K</b> VT <b>PD</b> N <b>K</b> V <b>LY</b> I <b>G</b> GV <b>K</b> S <b>D</b> GT <b>FN</b> R <b>N</b> V <b>Y</b> AY <b>D</b> LT <b>ST</b> W <b>S</b> IL <b>T</b> TL <b>P</b> Y <b>D</b> F <b>I</b> AG <b>D</b> I <b>T</b> ENT <b>F</b> NG <b>N</b> TY <b>Y</b> F <b>Y</b> GL <b>HP</b> D <b>T</b> TT <b>NN</b> F<br><b>S</b> I <b>I</b> S <b>NT</b> GT <b>V</b> TT <b>KL</b> SD <b>L</b> ST <b>A</b> IS <b>NS</b> Y <b>IV</b> G <b>AS</b> Y <b>LN</b> K <b>D</b> V <b>IR</b> L <b>V</b> D <b>NT</b> GR <b>HW</b> D <b>Y</b> DL <b>V</b> NS <b>K</b> IT <b>V</b> SL <b>TR</b> R <b>NN</b> F <b>Y</b> P <b>Q</b> NG <b>I</b> V <b>K</b> L <b>D</b> SD <b>K</b> CT <b>T</b> V <b>D</b> K <b>Y</b> GR <b>Y</b> I <b>Y</b> ITH <b>L</b> Y <b>QR</b> EF <b>S</b> E <b>R</b> ID <b>H</b> P <b>D</b> R <b>D</b> K <b>I</b> |

|      |                           |         |     |                                                                                                                                                                                                                                                                                                                                                                                                                                                                                                                                                                                                                                                                                                                                                                                                                                                                                                                                                                                                                                                                                                                                                                                                                                                                                                                                                                                                                                                                                                                                                                                                                                                                                                                                     |
|------|---------------------------|---------|-----|-------------------------------------------------------------------------------------------------------------------------------------------------------------------------------------------------------------------------------------------------------------------------------------------------------------------------------------------------------------------------------------------------------------------------------------------------------------------------------------------------------------------------------------------------------------------------------------------------------------------------------------------------------------------------------------------------------------------------------------------------------------------------------------------------------------------------------------------------------------------------------------------------------------------------------------------------------------------------------------------------------------------------------------------------------------------------------------------------------------------------------------------------------------------------------------------------------------------------------------------------------------------------------------------------------------------------------------------------------------------------------------------------------------------------------------------------------------------------------------------------------------------------------------------------------------------------------------------------------------------------------------------------------------------------------------------------------------------------------------|
|      |                           |         |     | SGFKTDVGTAYNDVVGWESLVDIYTAPMVICNEYDNTSIFFTFTVQSRAPNNTTTPQNLIGIYNRVTEKFTTFPSSQLSSVYGATCSDRDGNPIIVGGVKNKTLVQFTENG<br>ISYIDSRNVNNVFMFVYKFDMATKTIISQIATMPYQYGNAAFYDKDTRKLYMFGGYTAQKVYPWDIASNSLSTQRCMVYDVTNTFTSLIASLNPYGIWGNCFRKKDKKII<br>IFGGYIGLVDDKVDLPSLRQDLGNPNKLIYEYSISSNTYKDVSVVEYSFIQNFRLTNGKNEFCVHFAERIPNCKEKEILFYNLQNTSKDSSSGFIHTGYTPKFLGGQLNIL<br>NLDTKEFRVVDTANMVPPIASAALWSPYLSASKSLLHYGVDGKFFYEMNKYLAGSASFVNSPTKIGIVRNYL                                                                                                                                                                                                                                                                                                                                                                                                                                                                                                                                                                                                                                                                                                                                                                                                                                                                                                                                                                                                                                                                                                                                                                                                                                                                                                    |
| g295 | 213718:217833<br>(compl.) | 151,924 | 156 | MSLSRKSTKFSRQIISGNLAKDKKGNITGELDIDPKEFASVLLSGSNAEALKNSTFKFEVQGVISDVNDILILAETSKDFTFSGKINFNVDYDASATFDFAYNKSNDY<br>IKEGSFFSVAFKITLVDVTKGDKSYIGLKFDAALGSYILEAVSDSSQVVTLLKSTEYESYSVSTFLSNMFRSIPDIPKIGMAMRNVSGTVNSKNNKFYLYPGCAGENGLATG<br>LTYPNEIGFSSETGCNNVFEYNPETNSWR <del>EMAPFPEALYMSSTVEYKPGKNMIINYGVR</del> SIGIPVVGGSYFYIHDIENTYERIPVSHQFFSTAACIVNDTIYVFCGR <del>ETAY</del><br><del>VNSVPTTMVPPFFGLYKYNLLTGEETYVANK</del> YTAVERNENVANPTAFDQDSFNSSVYLPENLGIIFTAGIFRNNHKGTVLYKFDVATEEITKFMSPDFFLVSPKIRSPINDNK<br>LIMFTGVSGETTIPTVTGTGNGAYYTSAFRDIIEIDFNKDYRYREKLPYPGFVCGNGIGIFKDKRVILAGGCVNYGEGESSFFSDPDNKISTGLMHSNHAMIVDFNKSVIA<br>TNPVLSRLIPLNDNCTIPNTPVANWYNTQSASTSSNKVYTTILEKKN <del>TAYLFDTVKKTWTVSPVPAVVNYRLNMKGAAIDFDEANTIYSA</del> TDPSSEFSLQKINNFNSTITGY<br>SLVLLGSTAGTKDAADSSDRTLNKSTLFYFSPDGSITWAGKPYFKDNFYTSNDNRRILREYGNFYFNSTQNVFYMIGGKDEMSLNKSSGYGVYSVTNSVTR <del>YHDLIES</del><br>GSSIPLEKYAKYGSALVSI <del>SDTECIVFGGTTFDENGDKVYSSETFKLSLVNK</del> GDYLTPIYTQLQSIPIEFESSEGW <del>MR</del> ATK <del>INTNEIVLYAGR</del> AKNYSGTLVFK <del>YIIDTNK</del><br><del>EMVTQTE</del> CFALADLVKTPK <del>GEFYIPFGMVK</del> GSNGSISVTPPFKINAAYKPKIK <del>FTSFGISPVFTLGNR</del> TETNDIFITASTK <del>VLDSNDNIHYFGGVI</del> SGGAKSGESVFNH<br>WKAKVTENS <del>DGLFTLGTWQEDTIPSSLCQNSNGVAKTLPDGR</del> IVLIGGLWDLSSASTDLQTNPIKMYR <del>STLTIFDPVTNTYTEKQPTY</del> INNPLSVNVK <del>FINGTMSL</del> TNNP<br>DEILIFGGYK <del>YWSTVTDYHANTCFNK</del> VFKYSISANTLTYLGK <del>LSITDNPMAISPFR</del> NYAAVADNGTLFCFSSDNLSPDAMGNTGKILNNQVTVFDTLNTTTDEADANGLFK<br>TIDLTKESVIPAALESGR <del>VRPTYINLTGK</del> HSNGNFYIFPVWETK <del>STITAGIFNPYNK</del> KYNTGIPWQLISVPIEANKMIAPVTTALSTSTGIFSSDSSAYPEMFEKLSGK<br><del>IIVLPGMFGSRLNKSVYINGLGMFVVIS</del> |
| g297 | 220803:221486<br>(compl.) | 25,675  | 117 | <del>MATDIFQEV</del> TIPDSMTKAVFDGNGFCIKEGYVGTYNIHSTTREYIGSNREYVPGVTVAAAYAR <del>DLPPFAEYKQKVAAGVPOAILR</del> AVDYKGWQIVIDYRGYTIYNTTDKTP<br>KVVTSGFDIPTGFTLLAPTSEFDEWDGAK <del>WVVENKKLOASIDAANK</del> TQKTLMSEALEHINIYQDMLDFEMADDIEAVEAKLAEWKRYIAVYKISTVDPSTIVWPEKPVSM<br>FGDN                                                                                                                                                                                                                                                                                                                                                                                                                                                                                                                                                                                                                                                                                                                                                                                                                                                                                                                                                                                                                                                                                                                                                                                                                                                                                                                                                                                                                                                     |
| g298 | 221502:223613<br>(compl.) | 74,343  | 589 | MANLSRIAFLVR <del>TIPNLNSEEITGIYPGELFLVGDKK</del> AIFYK <del>QDGTVIS</del> SPSEAASTFLTIEGNLEEISDKAK <del>ARENLGKSAALKESGTDKGLYSVGDNFNSFLEESTIIS</del><br><del>ALDFNTYKFKSNEVIVLAK</del> AAATNIPVGLDLGNNVINMATGTSSK <del>EGFIAPVSDLANEKASYVLRCSYGTSSR</del> TFAVESIYTDKHKPNLNDLNVYSKETAK <del>DTFFQISNL</del><br><del>FSEIVDDDDKEIARLNLGLGTASVLNK</del> GTAK <del>GNVIVVGDGGLGINDNKVAALKSVIPAFYQLTDDSPDKPEVDKDYGVLSFPISK</del> TLTGVLVSSDGLVSLGIDGADGVELS<br>KVYLANNLPTLNELKALGTENNLSIDKDKAK <del>ARNLGLGDSATK</del> NVGTETGTVAAGD <del>DSR</del> ITGAAQDK <del>NLKDLDKSIAR</del> TNLELGSAAQKTAQTNITD <del>TTSGSLMQV</del> GAF<br><del>GLGGSGVPPFSGEGKDLIAFLKNAPSGMYR</del> FGDSSSYTNGIPSGQYSDILLMDHGGSNSKSAIAVDFSGQVFAICLRADGTSSGWVTIFSDTDFSNLLLP <del>IGVPIPYPLATP</del><br>PK <del>NFLKANGSAFDQVAFPKLLNYYP</del> SGVLPDLR <del>GEFIRGWDDGRNVDTGRN</del> ILTNQGD <del>AIRNITGKLNVLSSSDEPFSTADLFWANEGALDIIR</del> TGFSHSSGGGGGAGGGV<br>SGFTFDASK <del>SGVPTANENRPRNIAFNIIIRAK</del>                                                                                                                                                                                                                                                                                                                                                                                                                                                                                                                                                                                                                                                                                                                                                 |
| g300 | 224277:226469<br>(compl.) | 77,968  | 142 | <del>MANSRIVFILKRIPSMADPSINDVYPGEHFVTEDSGQLYKDLQGIIVTVGGGKAAVPASWVYTPSAKNFTFNFEGSNLEALEPFSSSIRFLTNANTVIGAGQNTITINIT</del><br>KNGSTLATR <del>DFPIVDIIGR</del> ELRKASIPGNAICDILFDG <del>TKFRVYNTYGFSS</del> TDGYSYFFDNNVVDGGSFVINSNDKK <del>GFVVLEDGTIVVGDGDKL</del> TNVTDL <del>FQLK</del> GNST<br>FDGNVNTGKLTGNNRVYSSK <del>GYDGILLSDIPTLDWSKLTN</del> ILPQDKVPAVTDNSNKIATTKVWADYIAYLGLTGGGAGGNGAVIDTKIQSTTATEGQTSFDFEYNADSLIV<br>LSTGHVLVGGEDYATDGT <del>TIVFTDPCDADEELMFINIGKLDQEKYLTADQINAIITGSNFATVTVYVQEQIDELIGGSSDALD</del> TLK <del>ELADALNNDPDFATTITNQLAGKADK</del><br><del>QHSHTWADITSGLP</del> TATESK <del>SGLIQLLTVSEAIK</del> GTDTTKAMHAAGTRELIRGVGFNGFNGVANYATSTVLTKNSIGRWRNFNQP <del>GI</del> VVTLV <del>YTELDATGWSIVPIYNYST</del><br>GPIITKCPTEHGFPTNSGIQITITLNAYSSVFCVFE <del>GNSTLNGESNMMFGEALAYGAGLKKVLGVNGYQVLP</del> SGIIIQW <del>GKLSINIANLIQNTYTDGRK</del> TSSITNGTY<br>PIPFPTSC <del>LFAFGGSNDTANTFVTTVY</del> PANSSGFAYKYESTGGPASAGSNTLSFIAIGY                                                                                                                                                                                                                                                                                                                                                                                                                                                                                                                                                                                                                                                                                                                                                              |
| g326 | 241918:243252             | 50,944  | 56  | MPEMNPDTIRNQVIEIAKGEAVITVNPVPCSLDTFLSAMTSPEVVINTFLPSDLYDKDLSNEEFKEIAFSVNTVLSYTYGATNVVPPSFDNCPPLARQNL <del>LLQNFIEA</del><br>GGTK <del>ETLDVLGVK</del> GFEKAFSMLLLPLGIAQCANMTDVRKSEI <del>ALNKINDGEDRIKNNINVIMGNIPLETSLDDIEALAREGNIDVNLFLARQKPEFNTVEV</del> IHRFKEFLDP<br>SRVMIQVDFTEDAFRTLLDEGYFS <del>DVRDLFTVANPMIMELADLREKYWDKFSWERALVKYTFSEIEILNRI</del> ISEGKMNAVASV <del>FQVMSDEMILANDEITFWRPEFNFDYW</del><br>FKGENDNKELRAEYAKHTPTNETVAVANVEVIRRHKKQELLMLAAITVSEMPIAVELTDES <del>GS</del> TVESRVSNPQNDKPV <del>DQRIKHKLLIPEVVDGKLQYSEEKDLSNFYEG</del>                                                                                                                                                                                                                                                                                                                                                                                                                                                                                                                                                                                                                                                                                                                                                                                                                                                                                                                                                                                                                                                                                                                                                                         |
| g333 | 249517:250233<br>(compl.) | 27,166  | 75  | MLNLNLLVNHIKARVGFTHRKLELSEEAIACLQ <del>QETLPTISTYMPFCMSSCNLGTDKVAQNMTY</del> WIEAK <del>SDEFDILDVTLVMPVVR</del> GMNSSAYMLTPIGADYQTIIGAI<br>TTSKFASTLNSAVLNPETWQFLPPNQLRVYSTYSLTELALVLK <del>TTHRKDFSTLPV</del> GASEMVKL <del>AYYDVMMDV</del> GFGRKYFSQLNTAVAQINLNMDELSSIPDKRDDLIERLR<br>KEQLKYSPTKKIYVA                                                                                                                                                                                                                                                                                                                                                                                                                                                                                                                                                                                                                                                                                                                                                                                                                                                                                                                                                                                                                                                                                                                                                                                                                                                                                                                                                                                                                             |

**Table S2.** HHpred-Homology detection & structure and function prediction by HMM-HMM comparison of  $\phi$ R1-37 ORFs. Included are hits with a probability >50%\*. Predicted functional categories for the hits are highlighted by different colors: **DNA replication and repair**, **Nucleotide metabolism**, **ATPases**, **Toxin-antidote system**, **RNA-polymerase and RNA interactions**, **Virion structural proteins**, and **Lysis proteins**

| Gp (size aa) | Region of similarity (size of hit, aa) | Function                                                                                       | Organism                                      | PDB <sup>s</sup> code | Probability (%) | E-value  |
|--------------|----------------------------------------|------------------------------------------------------------------------------------------------|-----------------------------------------------|-----------------------|-----------------|----------|
| Gp017(110)   | 12-50(54)                              | Putative regulator of transfer genes ARTA                                                      | <i>Staphylococcus aureus</i>                  | 3gxq                  | 72.13           | 2.2      |
| Gp024(67)    | 21-43(113)                             | Fibrin, gpwac E; bacteriophage T4 structural protein bacteriophage assembly attachment protein | T4                                            | 1aa0                  | 59.60           | 3.7      |
| Gp031(180)   | 84-138(470)                            | IMP-GMP specific 5'-nucleotidase                                                               | <i>Legionella pneumophila</i>                 | 2bde                  | 69.69           | 4.6      |
| Gp039(85)    | 58-85(199)                             | Uncharacterized protein; zonular occludens toxin                                               | <i>Neisseria meningitidis</i>                 | 2r2a                  | 75.70           | 0,89     |
| Gp045(368)   | 217-261(106)                           | TM1634; membrane protein                                                                       | <i>Thermotoga maritima</i>                    | 2vkj                  | 58.49           | 1.8      |
| Gp046(202)   | 17-133(167)                            | Peptidoglycan-recognition protein-LC isoform LCA; protein-peptidoglycan complex                | <i>Drosophila melanogaster</i>                | 2f2l                  | 91.2            | 0.27     |
| Gp049(261)   | 15-91(146)                             | Lysozyme zinc amidase and an inhibitor of T7 RNA polymerase                                    | T7                                            | 1lba                  | 87.91           | 0.46     |
| Gp051(117)   | 48-260(208)                            | Phosphate starvation-inducible protein; PHOH2, ATPase, PFAM: PF02562                           | <i>Corynebacterium glutamicum</i>             | 3b85                  | 99.88           | 1.1e-21  |
| Gp052(147)   | 5-92(204)                              | 3'-5' exonuclease ERI1; nuclease domain                                                        | <i>Homo sapiens</i>                           | 1w0h                  | 59.91           | 2.4      |
| Gp056(180)   | 10-87(1095)                            | RNA-dependent RNA polymerase                                                                   | Simian Rotavirus                              | 2r7r                  | 65.48           | 0.75     |
| Gp060(145)   | 1-175(240)                             | Molybdate/tungstate ABC transporter                                                            | <i>Archaeoglobus fulgidus</i>                 | 2onk                  | 100.00          | 4.1e-33  |
| Gp061(929)   | 1-142(134)                             | AP4A hydrolase; nudix protein, diadenosine polyphosphate                                       | <i>Aquifex aeolicus</i>                       | 3i7u                  | 99.91           | 3.3e-23  |
| Gp066(118)   | 1-909(1005)                            | DNA double-strand break repair RAD50 ATPase                                                    | <i>Methanocaldococcus jannaschii</i>          | 3auy                  | 99.98           | 1e-29    |
| Gp068(274)   | 5-68(492)                              | Insulinase family protease                                                                     | <i>Yersinia pestis</i>                        | 3go9                  | 64.23           | 7.9      |
| Gp069(217)   | 2-274 (326)                            | Ribose-phosphate pyrophosphokinase 1                                                           | <i>Homo sapiens</i>                           | 3s5j                  | 100.00          | 5.1e-69  |
| Gp070(584)   | 59-168(174)                            | HNH homing endonuclease; HNH catalytic motif-helix-turn-helix DNA binding domain               | Bacillus phage SPO1                           | 1u3e                  | 97.91           | 4e-07    |
| Gp071(58)    | 8-584(484)                             | Nicotinamide phosphoribosyltransferase                                                         | <i>Homo sapiens</i>                           | 3dhf                  | 100.00          | 3.2e-113 |
| Gp074(164)   | 21-55(56)                              | SVTR protein, transcription regulator; homodimer, ribbon-helix-helix, transcription repress    | <i>Sulfolobus islandicus</i> rod-shaped virus | 2kel                  | 83.10           | 0.64     |
| Gp076(121)   | 98-143(106)                            | Ferredoxin VI                                                                                  | <i>Rhodobacter capsulatus</i>                 | 1uwm                  | 75.93           | 1.3      |
| Gp077(131)   | 42-75(109)                             | Replicase polyprotein 1AB; RNA replicationATP-binding                                          | Human coronavirus 229E                        | 2j97                  | 81.04           | 1.8      |
| Gp081(463)   | 3-110(161)                             | Lincosamide antibiotic adenylyltransferase LinA                                                | <i>Staphylococcus haemolyticus</i>            | 4e8j                  | 99.68           | 6.4e-17  |
| Gp083(2553)  | 181-253(340)                           | Diaphanous protein homolog 1; helix bundle, protein binding                                    | <i>Mus musculus</i>                           | 1v9d                  | 67.80           | 28.39    |
| Gp084(119)   | 2141-2310(268)                         | Lytic transglycosylase; lysozyme                                                               | <i>Pseudomonas</i> phage $\phi$ KZ144         | 3bkh                  | 98.75           | 2.4e-08  |
| Gp086(178)   | 2-119(213)                             | Muramoyl-pentapeptide carboxypeptidase                                                         | <i>Streptomyces albus</i>                     | 1lbu                  | 99.91           | 7.3e-24  |
| Gp089(364)   | 42-176(120)                            | Crossover junction endodeoxyribonuclease RUSA                                                  | <i>Escherichia coli</i>                       | 2h8e                  | 99.97           | 1.1e-31  |
| Gp092(231)   | 267-335(213)                           | Muramoyl-pentapeptide carboxypeptidase                                                         | <i>Streptomyces albus</i>                     | 1lbu                  | 85.86           | 0.72     |
| Gp093(165)   | 28-165(166)                            | Calcium binding protein                                                                        | <i>Streptomyces coelicolor</i>                | 3akb                  | 56.59           | 36       |
| Gp096(690)   | 88-164(123)                            | Anti-sigma-factor antagonist (STAS)                                                            | <i>Moorella thermoacetica</i>                 | 3zxn                  | 63.79           | 25       |
| Gp097(219)   | 146-410 (596)                          | Telomerase reverse transcriptase                                                               | <i>Tribolium castaneum</i>                    | 3kyl                  | 99.83           | 1.2e-20  |
| Gp099(1393)  | 19-219 (277)                           | Putative ATP-dependent CLP protease proteolytic S                                              | <i>Homo sapiens</i>                           | 1t6g                  | 100.00          | 9.2e-38  |
| Gp100(358)   | 731-1392(1342)                         | DNA-directed RNA polymerase subunit beta                                                       | <i>Escherichia coli</i>                       | 3lu0                  | 100.00          | 1.4e-132 |
| Gp101(347)   | 81-351 (203)                           | Non-canonical purine NTP pyrophosphatase                                                       | <i>Coxiella burnetii</i>                      | 3tqu                  | 100.00          | 2.8e-56  |
| Gp102(603)   | 214- 327(115)                          | Polyadenylate-binding protein 1; RRM fold translation initiation, RNA-binding                  | <i>Homo sapiens</i>                           | 4f25                  | 99.71           | 1.7e-17  |
| Gp103(171)   | 90-561(1524)                           | DNA-directed RNA polymerase beta' chain                                                        | <i>Thermus thermophilus</i>                   | 2a6h                  | 100.00          | 2.5e-92  |
| Gp106(30)    | 9-145(193)                             | dCMP deaminase                                                                                 | Enterobacteria phage T4                       | 1vq2                  | 100.00          | 6e-37    |
| Gp107(175)   | 8-29(145)                              | BH1478 protein; unknown function                                                               | <i>Bacillus halodurans</i>                    | 2qup                  | 92.12           | 0.13     |
| Gp111(144)   | 21-152(174)                            | HNH homing endonuclease                                                                        | Bacillus phage SPO1                           | 1u3e                  | 99.93           | 1.8e-25  |
| Gp114(69)    | 1-96(102)                              | Aprataxin (resolves abortive DNA ligation intermediates during DNA repair)                     | <i>Homo sapiens</i>                           | 3kt9                  | 82.11           | 9        |
| Gp117(51)    | 1 -66(122)                             | Hypothetical protein                                                                           | <i>Vibrio cholerae</i>                        | 1u9d                  | 83.38           | 1        |
| Gp120(124)   | 12-43                                  | Fusion protein                                                                                 | Human respiratory syncytial virus             | 1g2c                  | 80.89           | 0.54     |
| Gp129(210)   | 34-107(294)                            | Putative diguanylate cyclase / phosphodiesterase                                               | <i>Thiobacillus denitrificans</i>             | 2r6o                  | 76.93           | 2.9      |
|              | 162-207(386)                           | RAN GTPase-activating protein 1                                                                | <i>Schizosaccharomyces pombe</i>              | 2ca6                  | 91.73           | 0.076    |

|             |               |                                                                      |                                             |       |       |         |
|-------------|---------------|----------------------------------------------------------------------|---------------------------------------------|-------|-------|---------|
| Gp130(201)  | 13-47 (73)    | RSGI RUH-014, rhomboid family protein                                | <i>Arabidopsis thaliana</i>                 | livg5 | 60.8  | 5       |
| Gp131(120)  | 2-100 (94)    | DNA binding protein HU                                               | <i>Anabaena sp</i>                          | 1p71  | 99.9  | 1.4e-26 |
| Gp133(154)  | 6-153(175)    | Gluconate kinase                                                     | <i>Escherichia coli</i>                     | 1knq  | 99.52 | 5.2e-13 |
| Gp143(210)  | 54-170 (592)  | Terminase, DNA packaging protein Gp17                                | T4                                          | 3cpe  | 98.4  | 2.5e-7  |
| Gp145(469)  | 1-374 (592)   | Terminase, DNA packaging protein Gp17                                | T4                                          | 3cpe  | 100   | 1.9e-36 |
| Gp147(268)  | 1-78 (463)    | Maltose ABC transporter periplasmic protein                          | <i>E.coli</i>                               | 2xz3  | 59.9  | 40      |
| Gp149(590)  | 1-458 (510)   | Tail sheath protein GP18                                             | T4                                          | 3foa  | 100   | 3e-49   |
| Gp150(250)  | 39-86 (234)   | 5'-methylthioadenosine nucleosidase                                  | <i>E.coli</i>                               | 3o4v  | 63.3  | 4.4     |
| Gp151(585)  | 272-376(105)  | Homing endonuclease                                                  | Bacillus phage 0305phi8-36                  | 3rp3  | 98.91 | 5.8e-9  |
|             | 271-377 (136) | DNA mismatch endonuclease                                            | <i>E.coli</i>                               | 1cw0  | 98.79 | 1.5e-8  |
| Gp154(240)  | 91-173 (238)  | Zink protease, cell division protein FTSH homolog                    | <i>Aquifex aeolicus</i>                     | 2di4  | 87.4  | 1.4     |
| Gp157(89)   | 4 -64(333)    | MutL DNA mismatch repair protein                                     | <i>Escherichia coli</i>                     | 1b63  | 65.63 | 7.7     |
| Gp163(174)  | 3-59(155)     | Calcineurin subunit B type 1                                         | <i>Homo sapiens</i>                         | 3l18  | 69.85 | 5.2     |
| Gp164(242)  | 7-123 (786)   | POL II, DNA polymerase II                                            | <i>E.coli</i>                               | 3k59  | 92.0  | 0.14    |
|             | 7-125(919)    | DNA polymerase delta catalytic subunit                               | <i>Saccharomyces cerevisiae</i>             | 3iay  | 74.2  | 2.5     |
| Gp167(420)  | 4-342 (919)   | DNA polymerase delta catalytic subunit                               | <i>Saccharomyces cerevisiae</i>             | 3iay  | 100   | 1.1e-40 |
| Gp168(159)  | 114-137 (63)  | Complexin-1; snare proteins                                          | <i>Homo sapiens</i>                         | 3rk3  | 76.7  | 2.2     |
| Gp170(576)  | 15-563 (919)  | DNA polymerase delta catalytic subunit                               | <i>Saccharomyces cerevisiae</i>             | 3iay  | 100   | 3.7e-63 |
| Gp171(561)  | 265-367 (155) | DNA mismatch endonuclease                                            | <i>E.coli</i>                               | 1cw0  | 99.6  | 7.1e-16 |
| Gp172(61)   | 20-61(126)    | DNA repair protein RadC                                              | <i>Chlorobium tepidum</i>                   | 2qlc  | 82.11 | 2.2     |
| Gp174(259)  | 4-52 (195)    | Protoglobin                                                          | <i>Methanosarcina acetivorans</i>           | 2veb  | 74.5  | 1.7     |
| Gp176(301)  | 233-261 (386) | RAN GTPase-activating protein 1                                      | <i>Schizosaccharomyces pombe</i>            | 2ca6  | 81.4  | 0.31    |
| Gp177(292)  | 47-125(247)   | Beta-phosphoglucomutase                                              | <i>Bacteroides vulgatus</i>                 | 3dv9  | 76.52 | 3.7     |
| Gp178(472)  | 10-414 (1524) | DNA-directed RNA polymerase subunit beta'                            | <i>Thermus thermophilus</i>                 | 2a6h  | 100   | 5e-71   |
| Gp179(310)  | 211-309 (155) | DNA mismatch endonuclease                                            | <i>E.coli</i>                               | 1cw0  | 99.3  | 4.5e-12 |
| Gp187(203)  | 11-102 (195)  | Hypothetical protein                                                 | <i>Aquifex aeolicus</i>                     | 1xm7  | 99.9  | 7.6e-25 |
| Gp188(28)   | 2-18(58)      | Hypothetical protein                                                 | <i>Schizosaccharomyces pombe</i>            | 2elk  | 69.65 | 1.3     |
| Gp189(59)   | 11-29(119)    | CREB-binding protein                                                 | <i>Homo sapiens</i>                         | 3p1f  | 81.72 | 0.59    |
|             | 27-56(141)    | Ephrin-B3                                                            | <i>Mus musculus</i>                         | 3d12  | 62.10 | 3.1     |
| Gp190(394)  | 160-232 (169) | Putative uncharacterized protein; YSCO, type III secretion apparatus | <i>Chlamydia trachomatis</i>                | 3k29  | 58.7  | 81      |
| Gp191(440)  | 237-393(295)  | Putative sensory BOX/ggdef family protein                            | <i>Vibrio parahaemolyticus</i>              | 3lid  | 73.5  | 15      |
| Gp193(325)  | 100-171(178)  | Diguanylate cyclase/phosphodiesterase                                | <i>Caldicellulosiruptor saccharolyticus</i> | 3mtk  | 82.29 | 1.6     |
| Gp197(282)  | 183-218 (57)  | Septum site-determining protein diviva                               | <i>Bacillus subtilis</i>                    | 2wuj  | 69.45 | 3.9     |
|             | 55-222 (470)  | DNA gyrase subunit A                                                 | <i>Mycobacterium tuberculosis</i>           | 3ilw  | 57.2  | 1.1e+2  |
| Gp198(263)  | 144-189 (78)  | NK-lysin; saposin fold, antibacterial peptide                        | <i>Sus scrofa</i>                           | 1nkl  | 55.6  | 0.45    |
| Gp203(248)  | 23-240 (1524) | DNA-directed RNA polymerase subunit beta'                            | <i>Thermus thermophilus</i>                 | 2a6h  | 93.3  | 0.099   |
| Gp204(505)  | 164-200(107)  | Probable protease HTPX homolog                                       | <i>Vibrio parahaemolyticus</i>              | 3cqb  | 96.35 | 0.00085 |
|             | 146-344(482)  | Nuclear membrane zinc metalloprotease ZMPSTE24 (FACE1)               | <i>Homo sapiens</i>                         | 4aw6  | 96.35 | 0.0051  |
| Gp211(214)  | 78-97(167)    | Peptidyl-Lys metalloendopeptidase                                    | <i>Grifola frondosa</i>                     | 1g12  | 83.16 | 0,57    |
| Gp213(229)  | 2-173 (154)   | Ribonuclease H1, HS-RNase HC, RNase H1                               | <i>Homo sapiens</i>                         | 2gkb  | 100   | 4.7e-33 |
| Gp214 (106) | 16-101(124)   | Hypoxia sensor histidine kinase response regulator Dost              | <i>Mycobacterium tuberculosis</i>           | 3zxx  | 82.67 | 4.5     |
| Gp218 (133) | 69-124(133)   | MCTP2 protein                                                        | <i>Homo sapiens</i>                         | 2ep6  | 72.13 | 6.2     |
| Gp219(119)  | 1-102 (755)   | Biodegradative arginine decarboxylase                                | <i>E.coli</i>                               | 2vyc  | 94.3  | 0.049   |
|             | 1-100 (153)   | Two-component response regulator, LUXR family                        | <i>Aurantimonas sp.</i>                     | 2cz5  | 92.8  | 0.59    |
| Gp229 (132) | 15-59(59)     | PRE-mRNA processing protein PRP40                                    | <i>Saccharomyces cerevisiae</i>             | 2b7e  | 92.38 | 0,029   |
| Gp230(469)  | 162-275(155)  | DNA mismatch endonuclease                                            | <i>E.coli</i>                               | 1cw0  | 99.5  | 1.3e-13 |
| Gp231(424)  | 5-423 (1524)  | DNA-directed RNA polymerase subunit beta'                            | <i>Thermus thermophilus</i>                 | 2a6h  | 100   | 3.5e-94 |
| Gp232 (31)  | 13-25(274)    | Urease Accessory Protein UreF                                        | <i>Helicobacter pylori</i>                  | 3cxn  | 86.94 | 0,2     |
| Gp236 (140) | 83-130(97)    | NF-YC; histone-like PAIR                                             | <i>Homo sapiens</i>                         | 1n1j  | 82.70 | 0.23    |
| Gp237(236)  | 132-221 (138) | Endonuclease, endodeoxyribonuclease I                                | T7                                          | 1m0d  | 97.2  | 0.00031 |
| Gp239(131)  | 16-83 (135)   | Transcriptional regulator CUER                                       | <i>E.coli</i>                               | 1q06  | 57.6  | 35      |
| Gp243(574)  | 9-574 (543)   | CPN60(groel); chaperonin, chaperone, groel, HSP60                    | <i>Thermus thermophilus</i>                 | 1we3  | 100   | 1.1e-92 |



|             |               |                                                        |                                       |       |       |
|-------------|---------------|--------------------------------------------------------|---------------------------------------|-------|-------|
| Gp244(290)  | 30-90(179)    | Ubiquitin-conjugating enzyme E2 H; UBE2H               | <i>Homo sapiens</i>                   | 61.69 | 17    |
| Gp247(353)  | 9-307(407)    | DNA primase                                            | <i>Aquifex aeolicus</i>               | 2au3  | 99.52 |
| Gp250(407)  | 5-376(2050)   | Protein RECArecombinase A                              | <i>E.coli</i>                         | 3cmu  | 100   |
| Gp258 (124) | 14-69(106)    | UvrB interaction                                       | <i>Geobacillus stearothermophilus</i> | 3fpn  | 70.59 |
| Gp261(658)  | 5-633(1342)   | DNA-directed RNA polymerase subunit beta               | <i>E.coli</i>                         | 3lu0  | 100   |
| Gp267(697)  | 11-697(671)   | DNA-ligase                                             | <i>E.coli</i>                         | 2owo  | 100   |
| Gp269(110)  | 2-108(168)    | Single-stranded DNA-binding protein                    | <i>Mycobacterium leprae</i>           | 3afp  | 99.98 |
| Gp274(452)  | 2-452(1407)   | DNA-directed RNA polymerase subunit beta'              | <i>E.coli</i>                         | 3lu0  | 100   |
| Gp278(295)  | 13-76(144)    | Ubiquitin carboxyl-terminal hydrolase 8                | <i>Homo sapiens</i>                   | 2a9u  | 54.00 |
| Gp280(118)  | 1-115((179)   | oxidative stress DPS DNA binding                       | <i>Lactococcus lactis</i>             | 1zuj  | 99.61 |
| Gp282(225)  | 11-76(127)    | Hypothetical protein                                   | <i>Shewanella frigidimarina</i>       | 2ook  | 52.90 |
| Gp284(98)   | 9-82(97)      | Putative RNA-binding protein                           | <i>Lactobacillus plantarum</i>        | 3kwr  | 99.75 |
| Gp285(288)  | 15-288(491)   | Type VI secretion system component                     | <i>E. coli</i>                        | 2p5z  | 99.87 |
|             | (211)         | GPV baseplate assembly protein V                       | Enterobacteria phage P2               | 3qr8  | 99.58 |
| Gp286(477)  | 68-477(574)   | Exodeoxyribonuclease V                                 | <i>Deinococcus radiodurans</i>        | 3e1s  | 100   |
| Gp287(225)  | 53-223(174)   | HNH homing endonuclease                                | Bacillus phage SPO1                   | 1u3e  | 99.97 |
| Gp289(251)  | 28-232(206)   | Endo-type membrane-bound lytic murein transglycosylase | <i>E.coli</i>                         | 3t21  | 99.95 |
| Gp294(1302) | 665-1163(568) | Kelch-like protein 12                                  | <i>Homo sapiens</i>                   | 2vpj  | 98.92 |
| Gp295(1372) | 206-538(624)  | Kelch-like ECH-associated protein 1                    | <i>Homo sapiens</i>                   | 1zgj  | 98.96 |
| Gp296(928)  | 482-847(568)  | Kelch-like protein 12                                  | <i>Homo sapiens</i>                   | 2vpj  | 98.58 |
| Gp297(228)  | 90-222(102)   | Uncharacterized protein                                | <i>Chromobacterium violaceum</i>      | 2kz6  | 99.9  |
| Gp298(704)  | 547-704(312)  | Bacteriophage T4 short tail fibre                      | Bacteriophage T4                      | 1ocy  | 99.97 |
| Gp299(173)  | 74-146(102)   | Uncharacterized protein                                | <i>Chromobacterium violaceum</i>      | 2kz6  | 99.6  |
| Gp300(731)  | 251-497(312)  | Bacteriophage T4 short tail fibre                      | Bacteriophage T4                      | 1h6w  | 94.89 |
| Gp301(210)  | 94-140(151)   | Uncharacterized protein                                | <i>Streptococcus mutans</i>           | 2qkp  | 79.44 |
|             | 94-136(118)   | Sensor protein DCUS                                    | <i>E.coli</i>                         | 2w0n  | 61.12 |
| Gp302(109)  | 4-107(94)     | Protein LUXT                                           | <i>Vibrio parahaemolyticus</i>        | 3b4s  | 73.9  |
| Gp303(180)  | 74-128(163)   | ATP-dependent RNA helicase DBPA                        | <i>Bacillus subtilis</i>              | 2hvj  | 74.99 |
| Gp304(430)  | 2-197(331)    | Uncharacterized protein                                | <i>Cytophaga hutchinsonii</i>         | 2r44  | 99.58 |
|             | 14-275(447)   | Replication-associated recombination protein A         | <i>E.coli</i>                         | 3pvs  | 99.55 |
| Gp305(611)  | 470-576(218)  | Conserved hypothetical protein BATB                    | <i>Bacteroides thetaiotaomicron</i>   | 3ibs  | 98.86 |
| Gp308(130)  | 1-103(104)    | Antidote protein of plasmid maintenance                | <i>Coxiella burnetii</i>              | 3trb  | 99.79 |
|             | 1-99(104)     | Antidote protein of plasmid maintenance                | <i>Nostoc punctiforme</i>             | 3cec  | 99.72 |
| Gp309(104)  | 1-103(104)    | Antidote protein of plasmid maintenance                | <i>Coxiella burnetii</i>              | 3trb  | 99.75 |
|             | 1-99(104)     | Antidote protein of plasmid maintenance                | <i>Nostoc punctiforme</i>             | 3cec  | 99.7  |
| Gp310(87)   | 2-29(110)     | 60S acidic ribosomal protein P11-P1 (L12P)             | <i>Triticum aestivum</i>              | 3iz5  | 74.58 |
| Gp311(441)  | 12-405(391)   | DNA gyrase BGYRB                                       | <i>E. coli</i>                        | 1ei1  | 100   |
| Gp313(248)  | 132-242(136)  | VSR endonuclease                                       | <i>E. coli</i>                        | 1vsr  | 99.7  |
| Gp314(357)  | 2-357(420)    | DNA gyrase subunit B                                   | <i>E. coli</i>                        | 3nuh  | 100   |
| Gp326(445)  | 175-309(208)  | Response regulatory protein                            | <i>Ps. fluorescens</i>                | 1yio  | 52.42 |
| Gp327(70)   | 1-70(496)     | DNA topoisomerase 4 subunit A                          | <i>Streptococcus pneumoniae</i>       | 2nov  | 100   |
| Gp328(311)  | 9-121(141)    | TC3 transposase                                        | <i>Caenorhabditis elegans</i>         | 1u78  | 99.03 |
|             | 127-304(199)  | homing endonuclease I-DMOI                             | <i>Desulfurococcus mobilis</i>        | 2vs7  | 99.93 |
| Gp329(749)  | 1-677(716)    | Topoisomerase IV subunit A                             | <i>E. coli</i>                        | 1zvu  | 100   |
| Gp331(238)  | 89-232(206)   | Endo-type membrane-bound lytic murein transglycos      | <i>E. coli</i>                        | 3t21  | 99.85 |
| Gp334(413)  | 10-389 (379)  | Exonuclease                                            | <i>Thermotoga maritima</i>            | 3tho  | 100   |
| Gp335(251)  | 37-245(444)   | DNAB replication FORK helicase                         | <i>Thermus aquaticus</i>              | 2q6t  | 96.49 |
| Gp336(282)  | 132-252(136)  | VSR endonuclease                                       | <i>E. coli</i>                        | 1vsr  | 99.7  |
| Gp337(357)  | 1-268(444)    | DNAB-like replicative helicase                         | Bacillus phage SPP1                   | 3bgw  | 100   |
| Gp341(87)   | 43-79(442)    | Adenylosuccinate synthetase                            | <i>Plasmodium falciparum</i>          | 1p9b  | 64.3  |
| Gp352(97)   | 17-74(109)    | Arginyl-tRNA synthetase                                | <i>Klebsiella pneumoniae</i>          | 3gdz  | 60.0  |
| Gp360(82)   | 12-51(85)     | Splicing factor 3 subunit 1                            | <i>Homo sapiens</i>                   | 2dt7  | 81.5  |

Gp363(84)

12-80(157)

Alanyl-tRNA synthetase

*Pyrococcus horikoshii*

1v4p

81.90

0,37

---

\*Probability is the most sensitive criterion; a value >95% indicates almost certain homology; value >50% indicates a possible hit.

§ PDB = Protein Data Bank

**Table S3.** PHIRE repeat search (length 20, mismatches 4). Alignment of the AU-rich repeat hits. shown are the repeats with 5 nt of flanking sequences.

| Promoter motif logo |                                  |                  |
|---------------------|----------------------------------|------------------|
| Promoter #          | Sequence                         | Before gene      |
| x                   | UCUUAAGGAUAUAUAAUUAAAUGAAGAAG    | overlapping g001 |
| 1                   | UUCUAAGGAUAUAUAAUUAAUUAAGAAUCU   | g011             |
| 2                   | UUUUAUUGAUUAUAUUAUUAUAAUGGAGGAA  | g029             |
| 3                   | UUUCAUACAUAUAUUAUUACUAAGAUAAAU   | g060             |
| 4                   | UUUUAUUGAUUAUAUUAUUUUUAUUGUAGUUU | g063             |
| 5                   | UUUUAGUAAUAUAUUAUAAUAAUGAUAAAC   | g064             |
| 6                   | UUUUGUUCAUUAUAUUAUUCUAAUGAUACAU  | g073             |
| 7                   | CAUUAUUGAUUAUAUUAUUUUAGUGUUAGUA  | g073             |
| 8                   | UAUCAUUGAUUAUAUUAUUUUAAUGUGAAAU  | g093             |
| 9                   | CAUCAAGGAUAUAUUAUCUUUGUGAUCAA    | g091             |
| 10                  | UUUUAUAAUAUAUUAUUAAAUGAUUCUCA    | g096             |
| 11                  | AAUUGCUGAUUAUAUUAUUUUAGUGAGUAGG  | g101             |
| 12                  | ACUUACGAGUAUAUUAUGAAAAGAAUUUCG   | tRNA-Arg g106    |
| 13                  | UUUUAUUCAUAUAUAAUUAUAAUAGAAUAU   | g107             |
| 14                  | AAUAAGCAUAUAUUAUUACCAUGAAGUAG    | g112             |
| 15                  | CUUUAAGAAUAUAUUAUUUUAGUGAUUUUG   | g118             |
| 16                  | UUUUAUUGAUUAUAUUAUUAAAUUGAUUGUU  | g122             |
| 17                  | UUUUAUUGAUUAUAUAAUCAUAUUGAAUAAU  | g132             |
| 18                  | UUUCAUGCAUAUAUUAUAAAGAAAGAUACA   | g136             |
| 19                  | UAUCAAAGAUUAUAUAAUUUUUAUAGAUAAU  | g137             |
| x                   | AUUCAGUGAUUAUAUAAUUAUUUGAAGGUU   | Within g138      |
| 20                  | AAUUAAGAUUAUAUUAUUUAGGUGAUAGAA   | g144             |
| 21                  | UUAUAGAAAUAUAUUAUUAAAUGAAAUAU    | g170             |
| 22                  | AUUCAUUGAUUAUAUAAUUUUUAUUGUACUU  | g173             |
| 23                  | AUAUGGUCAUUAUAUUAUUUAUUGACGAAU   | g176             |
| 24                  | AAUAGUGAUUAUAUUAUUUAAAUGUACUU    | g179             |
| 25                  | UUUUAAAGAUUAUAUAAUAAUAAUGAUAAU   | g182             |
| 26                  | UCUUAUUGAUUAUAUUAUUUUAAUGAAUAGU  | g188             |

|    |                                 |             |
|----|---------------------------------|-------------|
| 27 | UUUGAUGAAUAUAUAAUUAAAUGAUCUUU   | g194        |
| x  | GAAAUUCAUUUAUUAUAAUGAUGUUUUAGAU | Within g194 |
| 28 | UUUCGUUAAUAUAUUUAAAGUGAAAAGUA   | g211        |
| 29 | AUUGAAAAUAUAUUUAUUAACUUGAAUGAC  | g245        |
| 30 | UAAUAAUGAUUAUUAUUUUUAUUGAAGUAA  | g248        |
| 31 | UAUCAAGUAUAUAUUAUUUJAGUGAAAA GA | g251        |
| 32 | UUUCAUUAAUAUAUUUAAUUGAUGAUAUCA  | g252        |
| 33 | UUUAAACAUAUAUUUAAAUUGUGUAUAGU   | g261        |
| 34 | UUUUUUCAUAUAUUUAAAUGAUAAAU      | g262        |
| 35 | UUUUAAAAUAUAUAAUUAAAUAGAAUAAU   | g264        |
| 36 | AUAUUUAUAUAUUUUUAUAAGAAUUAUU    | g275        |
| 37 | UUUUACAUAUAUUUAAUUGUAAUCU       | g283        |
| 38 | AGUUUUUGAUUAUUUAUUUUGAUAGCU     | g286        |
| 39 | UUUUUAGGAUAUAUAAUUAUUGGAAUACC   | g303        |
| 40 | AUUUAUUGAUUAUUAUUUUAGUGAAUGAG   | g304        |
| 41 | AAAUAAUGAUUAUUAUUUUUAUGAAUAAA   | g306        |
| 42 | UUUUAAAUAUAUAUUUAAUAAUGAAUCCA   | g310        |
| 43 | UUUUAAUGAUUAUUAUUAUCAUGAUUUUC   | g316        |
| 44 | AAAUAAAAUAUAUUUAAAUAAGAAUACU    | g325        |
| 45 | UUUGAAAUAGAUUAUUUUUAGUGAGAGGA   | g326        |
| 46 | UUUUUUGUAUAUAUAAUUAUAAGGAUUAUU  | g327        |
| 47 | UUUUAAAUAUAUAUUUAAUUAUGAUAAUC   | g330        |
| 48 | UUUCAUUAAUAUAUUUUACAUGUAAUUG    | g283        |
| 49 | UUUUAAUGAUUAUAUUUAGUUUGAUAAUA   | g334        |
| 50 | CAUUGUAGAUUAUUAUUAUAAUUAAGAGGGG | g339        |
| 51 | AAAUAAAGAUAUAUUAUAAUUUUGAUUAUCU | rev g059    |
| 52 | UUUCAUUGUAUAUAUAAUUAUAGUGUGAAUA | rev g152    |
| 53 | UUUUAAAAUAUAUUUAAUAAUGAUAAUG    | rev g159    |
| 54 | UUAAAAUAAUAUAAAAUUUAUUGAAUAAGG  | rev g166    |
| 55 | UUUUAAUAAUAUAUUUCAUAAUAAUUUUU   | g169        |
| 56 | CUUCAAGAUUAUAUUUUUAAUGCGGUCU    | g232        |
| 57 | AUAAAAUAUAUUUAUAAUUAUGAAGAGUUU  | g274        |
| 58 | UAAAUAUAUAUUAAUGAAAGCAUUAUU     | g282        |
| 59 | CUAAUAUAUAUCUUAAAAGGUUAUAUUAA   | g333        |

**Table S4.**  $\phi$ R1-37  $\sigma^{70}$  promoters identified by the BROM search tool from intergenic regions without a phage-specific promoter and the g233 antisense promoter.

| Region between genes | The intergenic sequence upstream the ORF starting at the ATG codon. The -35 and -10 sequences of promoters are in bold upper case. Ribosomal binding sites underlined.                                  |
|----------------------|---------------------------------------------------------------------------------------------------------------------------------------------------------------------------------------------------------|
| g081-082             | tggtatgacttctctattcgattagtataactaa <b>TTGATG</b> ttccatcaacattcatt <b>TAGTAACG</b> tttatattaaataaaaaacg <u>GATC</u> aaatt <b>ATG</b>                                                                    |
| g082-081             | aattgatccgtttttaattataataaacgttactaa <b>ATGAAT</b> ggtgatggaacatc <b>AAATTAGTAT</b> actaatcgaat <u>AGGA</u> aaagtcatacc <b>ATG</b>                                                                      |
| g094-095             | tatctcagcctaaactatagactattaagtgt <b>TTTATA</b> Aaatcataact <b>TTTTATTAG</b> aaaaataataaacacggtattagtactaaa <u>AGGT</u> taaaataaaa <b>ATG</b>                                                            |
| g095-094             | accgtgttatttttctaataaaaagtattatga <b>TTTATA</b> Aaacactaata <b>GTCTATAGT</b> ttaggctagagatattctatatagaaaat <u>TAAGGA</u> ataaaa <b>ATG</b>                                                              |
| g099-100             | aaatttaaaatgataaataaacacataattttac <b>TTGACT</b> taagatagttattaa <b>TCTATAAT</b> Aatattaataacgaattacaaccaaggc <u>GAG</u> aaacgaagat <b>ATG</b>                                                          |
| g100-099             | agtgtaatagggaat <b>TTTATT</b> tcaatgtaaa <b>TCTTACTAT</b> ttttagaaaagtgtaatttttagtattttcaaacatagttttagaattacatacataactatattggt <u>AGGT</u> aat <b>ATG</b>                                               |
| g116-117             | aaataccaaatgttaaattggtgga <b>ATGCCT</b> atccgagataactac <b>AGATAGAAT</b> agttaaaaggcggttagaaaaattcactgcatccccgttcctaatttat <u>TAAGGA</u> acgaaa <b>ATG</b>                                              |
| g117-116             | ggtgcacgcttctactacctagaaaaataaacactacatccccgtaacgtggg <b>TTGTTA</b> atgcccttatctag <b>AGTTATCTA</b> aataaggcacccttcagcctga <u>AAGGA</u> attc <b>ATG</b>                                                 |
| g167-168             | atctaactagatttatctctataaaaactagtt <b>TTGAAA</b> taaacactaaaatagaaag <b>TGATCAATT</b> ttctatttcgtaaaccctta <u>TAAGGA</u> tttc <b>ATG</b>                                                                 |
| g168-167             | atgaaatcctataagggttaacgaaa <b>TAGAAA</b> attgatcact <b>TTCTATTTT</b> agtgtatttcaaaactagtttatagagataa <u>ATC</u> tagttaa <b>ATG</b>                                                                      |
| g208-209             | aattcaaftaatattaaaagaataaatctaattatagaacaagtg <b>TTTAGT</b> tctatagaaac <b>TAATAAGCT</b> tatttgttatag <u>AAGGA</u> atctctat <b>ATG</b>                                                                  |
| g209-208             | aataagcttattag <b>TTTCTA</b> tagaactaaacttg <b>TTCTATAAT</b> tagatttattcttttaattataaattgaaatttataatatttacttatatggaacaaaagtttagattctaattag <u>GGT</u> aaatc <b>ATG</b>                                   |
| g303-302             | atatcctaaaaaga <b>TTGTTT</b> gtttacacaaag <b>TTTTAAAA</b> Ttatatgatccacattaaggttttgaacaagaatttagaatctttatgtttgtttaaaatttttag <u>AAGGA</u> ttgctat <b>ATG</b>                                            |
| g286-285             | taatttcttcagacaaaatagctatcaataataatataatca <b>ATAACT</b> agtatataaaa <b>TATTATACT</b> tacaacaaataattgtaaaacta <u>TAAGGAG</u> ttttat <b>ATG</b>                                                          |
| g236-237             | ttctctcacctttaaggatagattcgttatttta <b>TTGAAA</b> aactatataga <b>TGTTAACAT</b> gaatatagttaacttatagaaaat <u>AGG</u> catctata <b>ATG</b>                                                                   |
| g237-236             | ttataagatgcctatattttctataagttaaactatattcatg <b>TTAACA</b> tctatagtttt <b>CAATAAAAT</b> aacgaatcatataaccttaa <u>AGGTGA</u> agaga <b>ATG</b>                                                              |
| antisense g233       | ttcattcttattagcctgagttgatgcttgtaataagaacagattgatctacaacgagaccgattaaaataatatact <b>TTGAAG</b> attatgcgtatacg <b>TAGTATTCT</b> acaatcagacctttaccagtttctgctgatagaggtctg<br>gta ← g232 start aat ← g233 end |

**Table S5.** Rho-independent transcriptional terminators of  $\phi$ R1-37.

| No | Range         | Dir | Hairpin sequence <sup>a</sup>     | Downstream 15 bp <sup>b</sup> |
|----|---------------|-----|-----------------------------------|-------------------------------|
| 1  | 6581:6608     | for | GAAAAGGTTCTCAAAAGAGAACCTACTC      | TTTTTTTATTGATAT               |
| 2  | 14453:14484   | for | CTCCCCATACCCTCTTTTCGAAGGTATGGGGAG | TCTTTGTTATGCTTC               |
| 3  | 14453:14484   | rev | CTCCCCATACCCTTCGAAAGAGGGTATGGGGAG | TTTTATTTCTTTTTTTT             |
| 4  | 17055:17082   | rev | CCCCTTATAGGCTTGAGCCTATAAGGGG      | TTTTATTTTTTTAAGG              |
| 5  | 21973:22000   | for | CCCTAATATACGAGGCTGTATATTAGGG      | GTTTTATTTTCAAAG               |
| 6  | 24980:25009   | for | CCCCATATCCTTCCAAAGAGGGATATGGGG    | TTATAAAACCATTTT               |
| 7  | 25644:25674   | for | TTTCCTCTGTATCAAAACGATACAGAGGAAA   | TTATAAATTCTTTTTT              |
| 8  | 30034:30063   | for | CCCTTATACCTTCTTCGAGGGTATAAGGG     | GTTTTACTTTTTTTGTA             |
| 9  | 30796:30818   | for | CCGTATCTTGATAAAAAGATACGG          | ATTTTTTAATCACTTT              |
| 10 | 32414:32443   | for | ACCCTATACCTTCTTCGAGGGTATAGGGT     | TCATTCTTTTTTTTTT              |
| 11 | 32926:32955   | for | CCCTTATACCTTCTTTGGAGGGTATAAGGG    | AAGTTTTTTTAGAAAA              |
| 12 | 33804:33831   | rev | CCCTAATCTAAAATGAATTAGATTAGGG      | AGTTTTTTATCAAAAA              |
| 13 | 45186:45211   | for | CCCCTGTAGGTTATTTCTACAGGGG         | ATTCTTTTTTTATGAT              |
| 14 | 51008:51035   | for | CCCCTATAGTCTATCAAGGCTATAGGGG      | AATTTTTAACTTTCTC              |
| 15 | 53016:53044   | for | CCCTATATCCCCTTTTGAGGGATATAGGG     | TATTTTTTTTTTTAGC              |
| 16 | 53016:53044   | rev | CCCTATATCCCCTCAAAAGGGGATATAGGG    | GTTTTATTACATCAA               |
| 17 | 54072:54099   | for | CCCATATCTCTCTATTGAGGGATATGGG      | TAAATTTATAAATTT               |
| 18 | 56250:56263   | for | GCGGGGAAACCCGC                    | TATTTTTTTTATCCAT              |
| 19 | 57404:57432   | for | CCCTATATCCCCTCTTTTCGGGGATATAGGG   | GTTTTATTTACTTTTTT             |
| 20 | 57404:57432   | rev | CCCTATATCCCCGAAAGAGGGATATAGGG     | AGTTTTTATTACACTA              |
| 21 | 64568:64595   | for | CCCATAACGTTTAAAAGCGTTATGGGG       | ATCCTTCAATATTAT               |
| 22 | 67551:67574   | for | GGGATAATAACTTTTCATTATCCC          | TTCTTTTTCATAAAGT              |
| 23 | 68134:68161   | for | CCCATATCCTTCGAAAGAGGGATATGGG      | AGTTTTATTTCTTTTTT             |
| 24 | 69994:70021   | for | CCCATATCCTTCCAAAGAGGGATATGGG      | AGTTTTTATTACAAAA              |
| 25 | 70443:70458   | for | GCCTACTTAGGTAGGC                  | TTTTATTTTTATATAA              |
| 26 | 71235:71265   | for | GAAGTGGGATAAATGGATTTTATCCCCTCC    | TATTTAGTATTTTTTA              |
| 27 | 72748:72775   | for | CCCATATCCTCTATTAAGGGGATATGGG      | GTTTTCTTTCTTTCT               |
| 28 | 74131:74144   | for | GACCTTATAAGGTC                    | TTTTTTTTTTTTTCATG             |
| 29 | 79770:79801   | for | TACCCTATACGTACTTAGTTGCGTATAGGGTA  | GAATATTTTTTTTTTTA             |
| 30 | 81890:81919   | for | GCAGTAAGAATCTCTTATGTTCTTACTGC     | ATTTTTATTTAATGGA              |
| 31 | 83119:83148   | for | CCCCATATCTCCTGAAAAGGTGATATGGGG    | TTTACTTTGCACTTA               |
| 32 | 83514:83535   | for | AAGACCTCCATAGCGGGGTCTT            | TTTTTTTTTTGAGGTT              |
| 33 | 86477:86504   | for | CCCATATCCTCTATAAAGGGGATATGGG      | GTTTTCTTTACAATT               |
| 34 | 88717:88738   | for | GGAGAAACTTTAAAGTTTCTCC            | TTTATATCTTTATTT               |
| 35 | 91965:91978   | for | CAGGGTAAGCCCTG                    | TTTTTTTTTTTCATTA              |
| 36 | 95128:95158   | for | TCCCCTATAGTCTGAACAAGGCTATAGGGGA   | TTAACTCTTATTTTTT              |
| 37 | 98568:98593   | for | CCCATATCCCTCCAAAGGGATATGGG        | TTTCTTTTATACTATT              |
| 38 | 100420:100444 | rev | CCCATATCTCTTTAAGAGATATGGG         | TTATTCTTATTTTTTT              |
| 39 | 101607:101632 | rev | CCATATCCTTCTTTTGAGGGATATGG        | ATTATTTTTTAATTAT              |
| 40 | 104480:104505 | rev | CCCCATACCTGTAAAAAGGTATGGGG        | ATTTTTTATTCTTACT              |
| 41 | 109811:109842 | rev | AACCCTATACCTCATAAAAAGGGGTATAGGGGG | ATTCTTTTTTTTTTTA              |
| 42 | 112757:112785 | for | CCCTATATCCCCTTTTCGAGGGATATAGGG    | AGTTTTTATTACTCTT              |
| 43 | 121025:121052 | for | CCCCCTATAGGTAAGGCCTATAGGGGG       | TTTATACTTTTTTTAT              |
| 44 | 121974:121999 | for | AAATGGTACTCCTAAGAGTACCATTT        | AATTATTTTTTTTTTC              |
| 45 | 125016:125043 | for | CCTATATCCTTCTTTTGAGGGATATAGG      | GTTTAATTTTTGTTTT              |
| 46 | 129212:129228 | for | GGGGATGAAGTATCCCC                 | TTTTATTTTTAATACT              |
| 47 | 131858:131885 | for | CCCCTATCCTTCTTTTGAGGGATAGGGG      | TTATTAACTTTTTTAT              |
| 48 | 132926:132952 | for | CATAGGGAGTTTAAAAACTCCCTATAG       | TTTAAACAATTTTTTG              |
| 49 | 134552:134580 | for | GACACAATACCTTGAACGGGTATTGTGTC     | TATTTATTTTTTTATT              |
| 50 | 135679:135705 | for | CCTTAACGGCTTATACGGTCGTTAAGG       | ATTATATTCTTTTTTT              |

|     |               |     |                                             |                  |
|-----|---------------|-----|---------------------------------------------|------------------|
| 51  | 138301:138329 | for | CCCTATATCCCCGAAAGAGGGATATAGGG               | AGTTTTATTACTCTT  |
| 52  | 138301:138329 | rev | CCCTATATCCCTCTTTTCGGGGATATAGGG              | GTTTATTTAAAAGTA  |
| 53  | 140035:140063 | rev | CCCCATATCATCTTAAAGGTGATATGGGG               | TTTTCTTTCTATTTT  |
| 54  | 141817:141840 | rev | CCCTATTCATTTTCGGTGAATAGGG                   | TAATTTCAACACATA  |
| 55  | 145324:145351 | rev | CCCCATATAGGTTTCATTCCTATATGGGG               | ACTCTTTAACAACCTC |
| 56  | 152382:152409 | for | CCCATATCCCTCTATCAAGGGGATATGGG               | GTATTTACTCTTTTT  |
| 57  | 153158:153188 | for | TATTCATACCCCTTAATCGGGGTATGAGTA              | TTTGATTATTTTTGT  |
| 58  | 154249:154276 | for | CCTATATCCCTCTTTTTCGGGGATATAGG               | GTTTATACTACTTAT  |
| 59  | 154648:154675 | for | CCCATATCCCTCTAAAGAGGGATATGGG                | TTTCTAATAAGGAAA  |
| 60  | 158561:158578 | for | GGGAGTAATTTTACTCCC                          | TTTATCTTATATATT  |
| 61  | 159512:159540 | rev | CCCTATACCTTCATAAAGAGGGTATAGGG               | AGTTTTATTACAACCT |
| 62  | 159512:159540 | for | CCCTATACCCCTCTTTATGAAGGTATAGGG              | AATTATTTTTTTTTTT |
| 63  | 161725:161765 | rev | CCTCTCATGAACATAAAAATTAGTTAAATTGTTTCATGAGAGG | TTTTTATGCAAATTT  |
| 64  | 163099:163125 | rev | CGCCTATGATCTTCACGGTCATAGGCG                 | TATTTATTTCTTTTT  |
| 65  | 171623:171655 | for | GTCGCTAATATCTAATTTAAAGGTATTAGCGGC           | TTTTTATTTCCATAG  |
| 66  | 179829:179856 | for | CCCCTATAAGGTTAATTCCTTATAGGGG                | ATCTTTTTTTTACGT  |
| 67  | 180392:180413 | for | CCCGCCTATAGATTTAGGCGGG                      | ATTTTTTTTTTATCGT |
| 68  | 181368:181382 | for | GCCCCTGTATGGGGC                             | TTTATTTTTATGGTG  |
| 69  | 184003:184037 | for | TTGAGAAACTCTAATAATCATTAGAGTTTCTCAA          | AGTTAATCTTTTTTT  |
| 70  | 186090:186117 | for | CGGGTAATAGTGTAAGCTATTACCCG                  | TATCTATCTTATTTT  |
| 71  | 186452:186472 | for | CCCCTAAGAAATTCCTTAGGGG                      | TTTTATAAATCTTTT  |
| 72  | 187091:187115 | for | CCCATATCCTCAAAGGGATATGGG                    | TTTCTTAATTTCTTT  |
| 73  | 191025:191053 | for | CCCTATATCCCTTTTTCGGGGATATAGGG               | AGTTTCTTTTTTTTTT |
| 74  | 191025:191053 | rev | CCCTATATCCCTCAAAGGGGATATAGGG                | GTTTATTTACTTTTT  |
| 75  | 195161:195186 | rev | CCCCTATAGGCTCAGTCCTATAGGGG                  | ATTCTTTTACTTTTT  |
| 76  | 197983:198011 | for | CCCTATACCCCTCTTTATGAAGGTATAGGG              | TTTATAATTTGAATT  |
| 77  | 198857:198885 | for | CCCTATACCTTCATAAAGAGGGTATAGGG               | AGTTATTTTTTTTTTT |
| 78  | 198857:198885 | rev | CCCTATACCCCTCTTTATGAAGGTATAGGG              | AATTTTATTACACGA  |
| 79  | 200697:200721 | rev | CCCTATACTATTGAATAGTATAGGG                   | TATTTTTAACTTTTT  |
| 80  | 203703:203728 | for | TCTAGGGGAAAGGATTTATCCCCTAGA                 | TTTTTTTTTTTATTAG |
| 81  | 203703:203728 | rev | TCTAGGGGATAATCCTTTCCCCTAGA                  | TTGGTAAAATTAACCT |
| 82  | 206958:206987 | for | GGTACAATAAGGACTCTCCCTTATTGTACC              | ATTTTTTTTTTTTATT |
| 83  | 206958:206987 | rev | GGTACAATAAGGGAGAGTTCCTTATTGTACC             | AGAAACTGCGTCGTT  |
| 84  | 208214:208241 | rev | CCCCATATCCCTTAAAGTGGATATGGGG                | TGTTTTATTTTCTAA  |
| 85  | 209119:209140 | rev | GCCCTATGGAAACCCATAGGGC                      | TTTTCTTTTTTAAGG  |
| 86  | 213671:213700 | rev | CCCCTAATAAGCATCATGTCTTATTAGGGG              | ACTTTTATTTACGAA  |
| 87  | 217885:217912 | rev | GACCTTATAACCAGAAATGGTATAAGGTC               | AATATTTTTTAACAA  |
| 88  | 220767:220794 | rev | CCCCTATAACTTATGAAAGTTATAGGGG                | TTCTTTAACAATTTCT |
| 89  | 223706:223737 | rev | CTCCCCTATAATCTCTTAAAGGCTATAGGGGAG           | ATATTTTTCAATAAAA |
| 90  | 226528:226554 | rev | CCCTAATGATCTTTCTGGTCATTAGGG                 | ATTTCTTAACAAAAA  |
| 91  | 229650:229678 | for | CGGGTAATGGGGTCTAATCCCATTACCCG               | ATATTTATTTTTTACA |
| 92  | 231559:231574 | for | GAGTCCTTCGGGACTC                            | TTTTTTTTTATTTAA  |
| 93  | 233194:233222 | for | TCCCCTAATAGTTAAAGCTATTAGGGGA                | TAATCTTTTTTTTTTT |
| 94  | 237107:237126 | for | GAAGGTGGATTGCCACCTTC                        | TTTTTTTTTAAGGTT  |
| 95  | 237492:237520 | for | CCCATATCCCTCTATAAAGGGGATATGGG               | GTTAATATCTTTTTTT |
| 96  | 243269:243286 | for | GATCCTCTTCGGAGGATC                          | TTTTTTTTTTTTTATA |
| 97  | 247206:247233 | for | GGGTATAAGGATTAATTTCTTTATACCC                | TATATTTTTTTATTT  |
| 98  | 247691:247710 | for | GGGGGTGTTAATACACCCCC                        | TTACACATTTACAC   |
| 99  | 249466:249493 | for | CCCTATACCTTCTTCGGAGGGTATAGGG                | AGTTTATTTTTTTTTT |
| 100 | 254530:254559 | for | CTCCATATCCCTCTACAAAGGGGATATGGGG             | TTTATTTTTTATTGTG |

<sup>a</sup>The complementary bases forming the hairpin stem are highlighted. T represents dU.

<sup>b</sup>Ts within 15 downstream nucleotides highlighted.
